1 **Aviva Samach<sup>1\*</sup>, Fabrizio Mafessoni<sup>1\*</sup>, Or Gross<sup>1\*</sup>, Cathy Melamed-**  
2 **Bessudo<sup>1</sup>, Shdema Filler-Hayut<sup>1</sup>, Tal Dahan-Meir<sup>1</sup>, Ziva Amsellem<sup>1</sup>,**  
3 **Wojciech P. Pawlowski<sup>2</sup>, and Avraham A. Levy<sup>1</sup>**

4 <sup>1</sup>Institution: Department of Plant and Environmental Sciences, The Weizmann  
5 Institute of Science, Rehovot, Israel.

6 <sup>2</sup>Institution: School of Integrative Plant Science, Cornell University, Ithaca, NY  
7 14853, USA.

8

9 \* Equal contributors

10 Correspondence: Avraham A. Levy - Department of Plant and Environmental  
11 Sciences, The Weizmann Institute of Science, Rehovot 7610001, Israel.

12 Telephone: (W) 972 8 934 2734. Fax: 972 8 934 4181 E-mail:

13 [avi.levy@weizmann.ac.il](mailto:avi.levy@weizmann.ac.il)

14

15 **A CRISPR-induced DNA break can trigger crossover, chromosomal loss**  
16 **and chromothripsis-like rearrangements**

17

18 **Short title** CRISPR-induced crossover and chromothripsis

19

20 Material distribution footnote: The author responsible for distribution of materials  
21 integral to the findings presented in this article in accordance with the policy  
22 described in the Instructions for Authors

23 (<https://academic.oup.com/plcell/pages/General-Instructions>) is: Avraham A.

24 Levy ([avi.levy@weizmann.ac.il](mailto:avi.levy@weizmann.ac.il)).

25

26 **Abstract**

27 The fate of DNA double-strand breaks (DSBs) generated by the Cas9 nuclease  
28 has been thoroughly studied. Repair via non-homologous end-joining (NHEJ) or  
29 homologous recombination (HR) is the common outcome. However, little is  
30 known about unrepaired DSBs and the type of damage they can trigger in plants.  
31 In this work, we designed a new assay that detects loss of heterozygosity (LOH)  
32 in somatic cells, enabling the study of a broad range of DSB-induced genomic  
33 events. The system relies on a mapped phenotypic marker which produces a  
34 light purple color (Betalain pigment) in all plant tissues. Plants with sectors  
35 lacking the Betalain marker upon DSB induction between the marker and the  
36 centromere were tested for LOH events. Using this assay we detected a flower  
37 with a twin yellow and dark purple sector, corresponding to a germinally  
38 transmitted somatic crossover event. We also identified instances of small  
39 deletions of genomic regions spanning the T-DNA and whole chromosome loss.  
40 In addition, we show that major chromosomal rearrangements including loss of  
41 large fragments, inversions, and translocations were clearly associated with the  
42 CRISPR-induced DSB. Detailed characterization of complex rearrangements by  
43 whole genome sequencing, molecular, and cytological analyses, supports a  
44 model in which breakage-fusion-bridge cycle followed by chromothripsis-like  
45 rearrangements had been induced. Our LOH assay provides a new tool for  
46 precise breeding via targeted crossover detection. It also uncovers CRISPR-  
47 mediated chromothripsis-like events that had not been previously identified in  
48 plants.

49 **Keywords:** chromosome loss; homologous recombination; breakage-fusion-  
50 bridge cycle; chromothripsis; DNA double stranded-break; CRISPR-Cas9;  
51 Somatic recombination; Loss of heterozygosity

52

## 53 **Introduction**

54 DNA double-stranded breaks (DSBs), can be repaired by non-homologous end-  
55 joining (NHEJ), or by homologous recombination (HR). Error-prone, NHEJ can  
56 generate small insertions or deletions (Indels) at the DSB site (Gorbunova and  
57 Levy, 1997). The outcomes of HR vary according to the homologous partners:  
58 recombination between repeats in cis can lead to deletions in the case of direct  
59 repeats or inversions in the case of inverted repeats (Lupski, 1998). HR between  
60 ectopic repeats (Shalev and Levy, 1997; Puchta, 1999) can lead to  
61 translocations. DSBs were also shown to induce crossovers between sister  
62 chromatids or homologous chromosomes in somatic cells (Molinier et al., 2004).  
63 The CRISPR-Cas9 system enables analyzing the DSB repair process at  
64 endogenous loci and in a targeted manner, becoming an invaluable tool for  
65 precise breeding (Barrangou and Doudna, 2016). It is now possible to perform  
66 targeted mutagenesis, or when multiple breaks are induced, NHEJ enables  
67 precise chromosome engineering through deletions, inversions or translocations  
68 of large chromosomal segments (Beying et al., 2020; Schmidt et al., 2020).  
69 CRISPR-induced HR-mediated repair enabled enhancing gene replacement  
70 frequencies (Schiml et al., 2014; Baltes et al., 2014; Dahan-Meir et al., 2018) or  
71 achieving targeted crossovers or gene conversions (Filler-Hayut et al., 2017; Ben  
72 Shlush et al., 2020; Filler-Hayut et al., 2021). However, in the absence of  
73 selection, rates of targeted crossover are quite low (Filler-Hayut et al., 2021), and  
74 in tomato, targeted crossover events were so far identified only by using visual  
75 fruit color markers (Filler-Hayut et al., 2017; Ben Shlush et al., 2020).

76

77 While the promises of genome editing for precise plant breeding are immense,  
78 there are still many challenges. Repair is not always efficient and unrepaired  
79 DSBs can have deleterious consequences that have not been carefully analyzed  
80 in the CRISPR context. Recent studies in mammalian cells have demonstrated  
81 that CRISPR-Cas9 can induce loss of heterozygosity (LOH) as a result of loss of  
82 segments, arms, or whole chromosomes, as well as a cascade of chromosomal  
83 rearrangements following cell divisions (Zuccaro et al., 2020; Alanis-Lobato et al.,

84 2021; Leibowitz et al., 2021). These rearrangements are similar to those found in  
85 cancer, and can have unintended consequences on the edited genomes and  
86 cells. A few percent of the cells that underwent Cas9-induced DSBs, exhibit  
87 chromosome bridges and, later, micronuclei (Leibowitz et al., 2021). This is  
88 consistent with a model in which chromosomal rearrangements occur through  
89 breakage-fusion-bridge-cycles (BFBC). Such cycles were first discovered in the  
90 pioneering work of Barbara McClintock, who studied the fate of chromosomes  
91 broken through irradiation or transposable element activities in maize. She  
92 proposed that sister chromatids of chromosomes with unrepaired broken ends  
93 become joined *via* what we call now NHEJ, generating a dicentric chromosome  
94 that can be broken at anaphase when the two centromeres are pulled to the  
95 opposite poles (McClintock, 1941). This process can repeat itself, triggering a  
96 cycle of random breaks between the centromeres and subsequent repair, leading  
97 to a breakage-fusion-bridge-cycle (BFBC). The outcomes of this process can be  
98 a range of chromosomal rearrangements, including deletions, duplication and  
99 inversion of large chromosomal segments or whole-chromosome loss. In cancer  
100 cells, the BFBC was shown to further trigger a series of catastrophic events,  
101 leading to chromothripsis: for example, an acentric segment can be excluded  
102 from the nucleus, forming a micronucleus, then the micronucleus DNA content  
103 can undergo fragmentation and the resulting fragments can re-integrate into the  
104 genome, causing additional chromosome rearrangements (Kwon et al., 2020;  
105 Ostapińska, Styka and Lejman, 2022).

106 In plants, there has been no evidence so far for the induction of a BFBC by  
107 CRISPR-Cas9-induced DSBs. In addition, chromothripsis has received little  
108 attention so far, except for findings in *Arabidopsis*, suggesting that genome  
109 elimination occurring in hybrids containing an altered centromeric histone CENH3  
110 was reminiscent of chromothripsis (Tan et al., 2015; Henry, Comai and Tan,  
111 2018).

112 In this work, we developed a new assay that enables visual detection of LOH  
113 using a hemizygous transgenic Betalain marker. DSB-induced LOH, due to

114 somatic loss or homologous recombination of chromosomal segments carrying  
115 the Betalain marker, could be seen as green sectors in a purple background or  
116 as twin sectors (green and dark purple) in leaves. Betalains are purple pigments  
117 found in flowers, leaves, roots, and fruits of plants of most families of the  
118 Caryophyllales (Strack, Vogt and Schliemann, 2003). Three enzymes are  
119 essential in the biosynthesis pathway of Betalains, and a cassette containing  
120 genes encoding them was inserted into several plant species, including *Solanum*  
121 *lycopersicum* (tomato) (Polturak et al., 2016). The genomic integration site of the  
122 T-DNA construct containing the three genes of the Betalain purple pigment  
123 biosynthetic pathway was identified, and the CRISPR-Cas9 system was used to  
124 induce DSBs between the marker and the centromere. Somatic sectors  
125 corresponding to putative deletion or HR events were segregated or regenerated  
126 into whole plants and analyzed at the molecular level, identifying a flower somatic  
127 sector on chromosome 3. These observations validate the concept that rare  
128 somatic crossover events can be visually detected at a desired locus, using a  
129 nearby transgenic marker. In addition, the LOH assay enabled us to detect  
130 unrepaired DSB events on chromosome 11, leading to the loss of the whole  
131 chromosome or chromosome segments carrying the T-DNA marker. We show  
132 that these events can be explained by the induction of a BFBC leading to  
133 chromothripsis.

134

## 135 **Results**

### 136 **A general system for DSB-induced LOH detection using a Betalain marker** 137 **and CRISPR-Cas9**

138 In order to characterize DSB-induced LOH events, and understand their  
139 underlying cause, we have developed a system based on a known-location  
140 dominant visual genetic marker (Betalain) in a heterozygous background (Figure  
141 1). A DSB induced in somatic cells anywhere between the marker and the  
142 centromere can be repaired by NHEJ, with no phenotypic consequences, or by  
143 HR, which, in case of a crossover can yield a twin sector, i.e. a wild type (WT)

144 color transgene-free sector and a transgene-homozygous dark purple sector in  
145 the light purple hemizygote background. If the DSB is unrepaired, LOH can also  
146 be detected as loss of the phenotypic marker.

147 The T-DNA construct (pX11) containing three Betalain biosynthesis genes was  
148 previously transformed into Micro-Tom (MT) (Polturak et al., 2017). Seeds were  
149 kindly provided by the Aharoni lab. We also generated new lines carrying pX11 in  
150 the M82 background. We mapped the T-DNA insertion site using inverse PCR  
151 (Figure 2). Primers were designed for the left border (LB) region of the pX11  
152 cassette (Supplementary Table S1). DNA from pX11 homozygous lines in the  
153 M82 and MT backgrounds was extracted and then digested using PstI and  
154 HindIII restriction enzymes respectively (Figure 2A). The digested DNA was then  
155 self-ligated and subjected to two rounds of PCR amplification with nested  
156 primers. PCR products were Sanger-sequenced using the LB primer (Figure 2B)  
157 (Thomas et al., 1994). Sequence regions that did not align with the pX11  
158 sequence were then BLASTed against the *S. lycopersicum* genome, which  
159 revealed the location of the junctions between the pX11 T-DNA and the M82 or  
160 MT genomes. Primers were then designed from both sides of the T-DNA  
161 insertion site to verify both the LB and RB junctions. This procedure confirmed  
162 the pX11 integration sites. In M82, the pX11 integration site was found on the  
163 short arm of chromosome 3, SL4.0ch3: 2,475,240, downstream of  
164 Solyc03g007960 (Figure 2C). In MT, pX11 integration was on the long arm of  
165 chromosome 11, SL4.0ch11:47305369, upstream of Solyc11g062370 (Figure  
166 2D).

167 In order to identify LOH events, the system included the mapped Betalain marker  
168 (Figure 2) in the F1 hybrid (MT x cv M82-pX11) and (cv M82 x MT-pX11)  
169 backgrounds. LOH could be identified as dark purple Bet/Bet, or WT transgene-  
170 free (green in leaves, yellow in flowers, or red in fruit) somatic sectors in the  
171 hemizygote light purple Bet/bet background (Figure 1). Moreover, SNPs  
172 differentiating between the parental lines could be used for genotyping at the  
173 whole-chromosome scale. Targeted DSBs were induced with CRISPR-Cas9

174 between the centromere and the T-DNA. MT and M82 plants containing the  
175 SpCas9 + gRNA, both controlled by constitutive promoters, were crossed to M82  
176 and MT pX11 plants, respectively (Figure 1).

177 On chromosome 3, we designed the gRNA to target a euchromatic region  
178 (Demirci et al., 2017) at position SL4.0ch3:4,234,645 in exon4 of *PSY1*, at the  
179 distance of 1,759,405 bp from the M82 pX11 marker towards the centromere  
180 (Figure 2C, Supplementary Table S2). A transgenic MT plant carrying SpCas9  
181 and *PSY1* gRNA produced an NHEJ footprint at the DSB target of GCT deletion  
182 (-GCT) in 50% of the reads, and G deletion (-G) in 50% of the reads (Dahan-  
183 Meir et al., 2018). This represents one chromosome with (-GCT) and one  
184 chromosome with (-G) footprints. Progeny of this MT plant carrying SpCas9 and  
185 *PSY1* gRNA, produced by selfing had the same NHEJ footprints at the *PSY1*  
186 gRNA DSB target site, [100% (-GCT), or 100% (-G), or 50% (-GCT)/ 50% (-G)],  
187 indicating no further DSB formation. The transgenic MT plant carrying SpCas9  
188 and *PSY1* gRNA was used for crossing with M82 pX11. Since the *PSY1* gRNA  
189 target on the MT chromosome 3 was mutated, only the M82 pX11 chromosome 3  
190 could be cleaved by Cas9 in the F1 plants.

191 On chromosome 11, we targeted the gRNA to a heterochromatic region (Demirci  
192 et al., 2017) at position SL4.0ch11: 47,124,456 (gRNA2), between two gene  
193 promoters at the distance of 180,895 bp from the MT pX11 marker towards the  
194 centromere (Figure 2D, Supplementary Table S2). The transgenic M82 plant with  
195 SpCas9 and gRNA2 gave an NHEJ footprint at the DSB target of +T insertion  
196 (+T) in 100% of the reads. Progeny of this plant produced by selfing had the  
197 same NHEJ footprint at the chromosome 11 gRNA2 target site [100% (+T)],  
198 indicating no further DSB formation. The transgenic M82 plant with SpCas9 and  
199 gRNA2 was used for crossing with MT pX11. Since the gRNA2 target of the M82  
200 chromosome 11 was mutated, only the MT pX11 chromosome 11 could be  
201 cleaved by Cas9 in the F1 plants.

202

203 **Screening for twin sectors as putative crossover events**

204 Twin sectors, consisting of a dark purple sector (*Bet/Bet*) adjacent to a WT sector  
205 (*bet/bet*) in the light purple background (*Bet/bet*) can represent putative somatic  
206 crossover events originating from a reciprocal exchange between chromatids of  
207 homologous chromosomes as shown in Figure 1. To induce and visually identify  
208 such somatic events, we screened (*Bet/bet*) plants where DSBs were induced  
209 between the Betalain markers mapped on chromosomes 3 and 11 and  
210 centromeres as shown in Figure 2 C and D, respectively.

211 To search for twin sectors for the chromosome 3 target (Figure 2C), ten F1 light  
212 purple (*Bet/bet*) plants containing SpCas9 + PSY1 gRNA and ten F1 purple  
213 (*Bet/bet*) control plants containing SpCas9 but lacking the gRNA (Supplementary  
214 Table S3) were grown in the greenhouse. Most plants appeared to be  
215 phenotypically heterozygous (light purple) with no twin sectors large enough to  
216 represent a high-confidence CO event (Figure 3A). A flower of one of the plants  
217 showed in a petal a somatic twin sector consisting of a dark purple *Bet/Bet* sector  
218 adjacent to a yellow *bet/bet* (WT) sector in the background of light purple *Bet/bet*  
219 (Figure 3B, Supplementary Table S4). The fruit generated from this chimeric  
220 flower produced six viable F2 progeny plants. Among them, one light purple F2  
221 (*Bet/bet*) plant had a crossover (CO) event on chromosome 3. On the telomere  
222 side, both the *PSY1* gRNA site and the SNP closest to the *PSY1* gRNA were  
223 heterozygous (M82/MT) while the next SNP towards the centromere was  
224 homozygous MT (Figure 3C, 3D). This plant was analyzed by whole genome  
225 sequencing and did not exhibit changes in the number of reads along both sides  
226 of the DSB site (Supplementary Figure S1). Therefore, this change from  
227 heterozygote to homozygote is unlikely to be due to a chromosome segment  
228 loss. The plant was fertile and produced viable F3 seeds further confirming that  
229 this was a genuine targeted CO. We did not find CO events in ten F2 progeny of  
230 other fruits of the same plant, nor in ten F2 progeny of M82 pX11 x MT SpCas9  
231 control plants lacking *PSY1* gRNA.

232 For Chromosome 11 (Figure 2D), where the pX11 cassette was mapped to  
233 SL4.0ch11:47305369, we found an additional visual marker on the long arm of



234 chromosome 11: the *CLAVATA3* (*CLV3*) gene located at position  
235 SL4.0ch11:52945095, between the pX11 cassette and the telomere. Seeds of  
236 the *clv3-1* mutant in the M82 background were kindly provided by Zach  
237 Lippman's lab. The *clv3* mutants exhibit a fasciated phenotype in flowers and  
238 fruits (Xu et al., 2015), seen as an increase in floral organs and fruit locules  
239 compared to WT plants (Figure 5 M82 *clv3*). We used *clv3* as an additional  
240 genetic marker to detect recombination or other chromosomal rearrangements.  
241 *CLV3* is 5.82Mb upstream from gRNA2 towards the telomere. The transgenic  
242 M82 *clv3* plant with SpCas9 and gRNA2 was crossed with MT pX11. Ten F1 light  
243 purple (*Bet/bet; Clv3/clv3*) plants containing SpCas9 + gRNA2 and ten F1 purple  
244 (*Bet/bet; Clv3/clv3*) control plants containing SpCas9 but lacking the gRNA  
245 (Supplementary Table S3), were grown in the greenhouse. After 8 weeks, all  
246 plants appeared phenotypically heterozygous to the Betalain marker (light purple)  
247 with no visible twin sectors large enough to represent COs and no green sectors  
248 expected of LOH events.

249

## 250 **Genotyping and phenotyping of Somatic LOH events**

251 As the presence of large sectors is a rare occurrence, we wanted to have an  
252 additional screen that allows the detection and regeneration of whole plants from  
253 small sectors. To do it, we grew ten F1 seedlings each for chromosome 3 and 11  
254 markers in sterile conditions for regeneration from cotyledons to search for small  
255 green somatic sectors. Our plan was to regenerate whole plants from these  
256 sectors and identify the underlying cause of their phenotypes. We hypothesized  
257 that the F1 plants either experienced loss of heterozygosity (LOH) or that the  
258 transgene was silenced. Two-week-old purple seedlings (*Bet/bet*), confirmed for  
259 SpCas9 presence (Supplementary Table S3), were dissected into small pieces  
260 and transferred into tissue culture for whole-plant regeneration. On average 160-  
261 180 leaf pieces per plant were prepared from each of the ten F1 purple (*Bet/bet*)  
262 plants. Calli and newly emerging plantlets were identified, and green plantlets  
263 were observed (Figure 4).

264 For each green regenerated plant, the presence/absence of the pX11 T-DNA, or  
265 at least one of its borders junctions with the genomic integration site, was verified  
266 by PCR. For chromosome 3, two F1 green plants were regenerated, representing  
267 candidates for LOH. We found that the plants did not lose the pX11 T-DNA, thus  
268 we concluded they were silencing events. One silencing event was also  
269 observed among the control F1 purple (*Bet/bet*) SpCas9 plants. For  
270 chromosome 11, one silencing event was observed among F1 purple (*Bet/bet*;  
271 *CLV3/clv3*) SpCas9 + gRNA2 plants and one in the control among F1 purple  
272 (*Bet/bet*; *CLV3/clv3*) SpCas9 plants. These data suggest that gene silencing was  
273 not related to the occurrence of distant DSBs. Thus, these silencing events  
274 (Supplementary Table S4) were not further analyzed.

275 In addition to the plants carrying gene silencing events, other green regenerated  
276 plants were analyzed (Figure 5, Supplementary Table S4). Three such plants  
277 (Figure 5; plants 3-1, 5-1, 5-2) had lost the T-DNA insertion region but were  
278 heterozygous for all SNPs around the T-DNA, including in the region of the gRNA  
279 target, as expected for F1 plants (Figure 5). Moreover, these plants also had the  
280 expected F1 *Clavata* genotype (*Clv3/clv3*) and phenotype (Figure 5A) and were  
281 fertile, suggesting that no major chromosomal rearrangements had occurred.

282 Two plants lacked the T-DNA pX11 cassette and showed a transition from  
283 heterozygous SNPs to SNPs homozygous for the M82 parent (Figure 5, plants 1-  
284 1, 5-4) in the DSB region. The plants were also homozygous for the telomeric  
285 *clv3* allele mutation and had severely fasciated flowers and fruits (Figure 5B).  
286 These plants could have been considered exhibiting targeted crossover events,  
287 based on their SNP genotype and the phenotype. However, these phenotypes  
288 and genotypes could also be explained by a loss of chromosome arm from the  
289 DSB site to the telomere. This possibility was strengthened by the high sterility of  
290 the plants and was further confirmed through whole genome sequencing (see  
291 below) (Figure 6).

292 Plant 9-1 also lacked the T-DNA pX11 cassette and was homozygous for all the  
293 M82 SNPs. Moreover, it was homozygous for the *clv3* allele - it had the most

294 severely fasciated flower phenotype and was totally sterile, bearing no fruits  
295 (Figure 5C). This genotype/phenotype could be explained by a complete  
296 chromosomal loss, as confirmed by whole genome sequencing analysis  
297 described below (Figure 6).

298

### 299 **Whole genome sequence analysis of LOH events**

300 Whole genome sequencing (WGS) was performed for plants 3-1, 5-1, 5-2, 1-1, 5-  
301 4, 9-1, and for the Micro-Tom and M82 lines. The sequencing coverage, in plants  
302 3-1, 5-1, and 5-2 (Supplementary Figure S2A, S2B, S2C, respectively), was  
303 similar to that of the parental plants, Micro-Tom and M82 (Figure 6A, 6B). The  
304 ploidy dosage was determined using sequencing coverage analysis as described  
305 in the Materials and Methods. SNPs in the reads could be anchored to the  
306 parental sequences and therefore this analysis enabled assessing deviations  
307 from the diploid dosage as well as homozygosity, heterozygosity, and  
308 hemizyosity.

309 Analysis of F2 progeny of plant 5-1 homozygous for MT SNPs on both sides of  
310 gRNA2 and pX11 revealed a 4069bp fragment between the NOS terminator  
311 inverted repeats was missing from the pX11 T-DNA on chromosome 11  
312 (Supplementary Figure S3A). Except for the deleted part of the pX11 T-DNA in  
313 plants 3-1, the dosage was 2X in all chromosomes, including chromosome 11.

314 WGS of F2 progeny of plants 3-1 and 5-2, which were also homozygous for MT  
315 SNPs on both sides of gRNA2 and pX11, showed that a 17396bp fragment of  
316 chromosome 11 (SL4.0ch11:47301145 -47318550) spanning the original T-DNA  
317 insertion site (SL4.0: 47305385) was missing, as confirmed by Sanger  
318 sequencing (Figure 5). Except for the deleted parts spanning the pX11 T-DNA in  
319 plants 5-1, and 5-2 the dosage was 2X in all chromosomes, including  
320 chromosome 11. Both sides of the deleted region spanning the T-DNA, are  
321 flanked by A-rich repeats (Supplementary Figure S3B). Note that T-DNA loss  
322 was not detected in control plants where no DSB induction occurred.

323 WGS of F1 9-1 showed the expected 2X coverage, and SNP heterozygosity,  
324 throughout the genome except for chromosome 11 where significant deviations  
325 were observed (Figure 6E). The coverage dosage was 1X throughout  
326 chromosome 11, and SNPs corresponded only to the M82 parent (Figure 6E).  
327 Note that such massive loss was detected only in plants containing Cas9 and  
328 gRNA where a DSB was induced, and not in control plants.

329 WGS of plants 1-1 and 5-4 confirmed the transition from heterozygous to M82  
330 SNPs precisely at the SpCas9-induced DSB site (Figure 5). The analysis of  
331 dosage of sequencing reads showed that in both 1-1 and 5-4, the dosage around  
332 the targeted DSB site changed from 3X (possible duplication) or 2X (diploid),  
333 respectively, to 1X (haploid). This result indicates that a segment from the DSB  
334 region closer to the telomere of the long arm of chromosome 11 was lost (Figure  
335 6C, 6D, 6F, 6G) as it would be expected for unrepaired DSB events.

336 WGS of F1 9-1 showed the expected 2X coverage, and SNP heterozygosity,  
337 throughout the genome except for chromosome 11 where significant deviations  
338 were observed (Figure 6E). The coverage dosage was 1X throughout  
339 chromosome 11, and SNPs corresponded only to the M82 parent (Figure 6E,  
340 6H), with the exception of reads across the centromere, possibly due to mapping  
341 biases. Note that such massive loss was detected only in plants containing Cas9  
342 and gRNA where a DSB was induced, and not in control plants.

343

#### 344 **Multiple chromosomal rearrangements are associated with telomere loss**

345 The WGS dosage analysis revealed additional rearrangements in plants 1-1 and  
346 5-4. Plant 1-1 had a ~20Mb region between the DSB and the centromere that  
347 became duplicated, showing a 3X chromosome dosage (Figure 7). This  
348 duplication transitioned to chromosome segment showing a 1X dosage precisely  
349 at the DSB site (Figure 7A). This kind of duplication and deletion event could be  
350 explained by loss of an acentric chromosome fragment distal to the DSB (and  
351 hence the 1X dosage) followed by fusion of two centromere-bearing sister

352 chromatids, which would initiate a breakage-fusion-bridge-cycle (BFBC) (Figure  
353 7D). During a BFBC, when the two centromeres are pulled to the opposite poles  
354 in anaphase, a new break is generated randomly along the bridge, eventually  
355 leading to a duplication, hence the 3X dosage shown as region A (Figure 7A and  
356 D) in an inverted orientation (Figure 7D).

357 In plant 5-4, a region between the DSB and the centromere was missing (Figure  
358 7B). The estimated dosage in this region was 1.5X, which may indicate  
359 chimerism. To better understand this event, we examined the DSB junctions  
360 using inverse PCR amplifying sequences adjacent to the chromosome 11 gRNA2  
361 region (Supplementary Table S6). This approach was successful in plant 5-4, but  
362 not in plant 1-1. Surprisingly, the amplified product showed a junction between  
363 the chromosome 11-gRNA2 and regions located on chromosome 9 (Figure 7F).  
364 We then designed a primer to the putative chromosome 9 sequence and verified  
365 the junction by PCR and Sanger sequencing (Supplementary Table S7,  
366 Supplementary Figure S4A). We also verified the upstream junction of the  
367 chromosome 11 gRNA region using a primer targeting the putative upstream  
368 chromosome 9 sequence and the primer from the chromosome 11-gRNA2 region  
369 (Figure 7F, Supplementary Figure S4B). The translocation represented by the  
370 two junctions was further confirmed by the finding of WGS Illumina reads  
371 corresponding to the chimeric junctions between chromosomes 11 and 9  
372 (Supplementary Figure S5). The directionality of the joined Illumina reads, and  
373 the primers used for PCR amplification of the junctions support the model shown  
374 in Figure 7E, suggesting that in 5-4 the A inverted repeat region was broken and  
375 translocated to chromosome 9 (Figure 7E, 7F, Supplementary Figure S4, S5).  
376 Such rearrangement is similar to events resulting from chromothripsis  
377 (Ostapińska, Styka and Lejman, 2022; Stephens et al., 2011). We did not find  
378 any potential SpCas9-gRNA2 target sites in the chromosome 9 translocation  
379 region that could explain why the A fragment was inserted specifically at that  
380 location. Taken together, the complex rearrangements in plant 5-4 might be best  
381 explained through a scenario where the first BFBC round, which was similar to  
382 that in plant 1-1 (Figure 7d), was followed by a second round in which the A

383 duplicated region was broken and translocated to chromosome 9. The second  
384 daughter cell would contain the broken MT chromosome 11 with the blue B  
385 region. These two daughter cells generated after the second BFBC may be the  
386 progenitors of the tissues analyzed in plant 5-4 (Figure 7E).

387 In plant 9-1, the coverage dosage was 1X throughout chromosome 11, with  
388 SNPs corresponding only to the M82 parent (Figure 7C), except for the  
389 centromere region (23.24Mb), where the dosage was 2X. Since the centromere  
390 region is rich in repeated sequences, it is difficult to determine if this is a  
391 misalignment artifact and in fact the whole MT chromosome was lost.  
392 Alternatively, it might be a near-complete loss of chromosome 11, with only a  
393 minichromosome consisting of chromosome 11 centromere remaining.

394 Cytological analysis of plants 1-1 and 5-4 pollen mother cells revealed the  
395 presence of bridges during meiotic anaphase I (Figure 8A), and micronuclei in  
396 tetrads (Figure 8B and 8C). The detection of bridges further suggests the  
397 presence of the chromosomal rearrangements detected by WGS. The  
398 rearrangements could be the results of prior BFBC episodes. The presence of  
399 micronuclei is also consistent with either the presence of acentric chromosome  
400 fragments or chromosomes that cannot pair properly, presumably as the result of  
401 their rearrangements.

402

## 403 **Discussion**

404 We have developed a system that enables visual identification of a wide range of  
405 chromosome alterations. We report examples of such alterations, including a  
406 crossover and LOH due to chromosomal rearrangements ranging from segment  
407 to whole chromosome loss or translocation. The system is based on a  
408 previously-mapped visual transgenic marker. In principle, the Betalain  
409 biosynthesis marker can serve to monitor LOH on any chromosome as well as in  
410 many plant species, making this system quite general. This marker can be

411 combined with additional phenotypic markers, as done here with the recessive  
412 *c/v3* mutation on chromosome 11, to facilitate the analysis of the studied events.

413 We showed that twin sectors could be useful in detecting a targeted crossover at  
414 the site of induced DSBs located between the centromere and the marker on  
415 chromosome 3 (Figure 3). We found a single large twin sector in a flower of a  
416 plant out of 10 plants, and we confirmed in the progeny of this flower that a  
417 targeted crossover took place at the DSB induction site. Such crossover could  
418 give rise to reciprocal events, either a purple (i.e., containing the T-DNA marker)  
419 or a green WT transgene-free targeted recombinant. In this single event, we  
420 obtained a purple plant, but in principle, the system can be used also for the  
421 recovery of transgene-free germinal recombinant events making it a useful tool.  
422 The potential benefits of such systems in plant breeding have been thoroughly  
423 discussed (Taagen et al., 2020; Sukegawa, Saika and Toki, Rönspies et al.,  
424 2021). The rate of occurrence of twin sectors was low, which is consistent with  
425 our previous works on targeted somatic crossovers in tomato (Filler-Hayut et al.,  
426 2017; Ben Shlush et al., 2020) and Arabidopsis (Filler-Hayut et al., 2021). The  
427 system described here is not restricted to a particular chromosomal site and can  
428 be applied to screen for rare events. In addition, it can be used to screen for  
429 regions in the genome, or for mutants, that are more prone to repair via HR and  
430 via CO. Before, we used a natural marker at the *Sulfur* locus in tobacco to  
431 identify the *Hyrec* mutant exhibiting high somatic recombination rates  
432 (Gorbunova et al., 2000). The *Hyrec* locus has not been characterized at the  
433 molecular level, but its phenotype shows that reaching high rates of somatic  
434 crossover might be feasible.

435 Because of the low number of large green or twin sectors seen in whole plants,  
436 and to enable obtaining of germinal from somatic events, we also screened for  
437 green calli regenerated from leaves of light purple F1 plants. When testing the  
438 chromosome 3 euchromatic target, we did not detect WT sectors corresponding  
439 to DSB-induced LOH. With the heterochromatic chromosome 11 DSB target, we  
440 found 6 independent LOH events. All of these events were deletion events of

441 various sizes and not CO events. The abundance of repeats in the chromosome  
442 11 DSB target might have triggered defective repair as previously reported for  
443 centromeric regions (Barra and Fachinetti, 2018). These LOH events were  
444 genotyped locally around the break and genome-wide, using WGS. In three out  
445 of these 6 plants, the Betalain-coding T-DNA was fully or partially eliminated. The  
446 mechanistic underpinnings of these transgene elimination, 180 Kb away from the  
447 DSB, events are not clear. It is well known that somaclonal variation induced in  
448 tissue culture can give rise to chromosomal rearrangements, even without DSB  
449 induction. However, we did not detect T-DNA loss in SpCas9 control plants. It is  
450 possible that the deletions were induced through a long-range repair mechanism  
451 that remains to be discovered. Note that off-site DSBs are an unlikely  
452 explanation for T-DNA loss as deletions occurred in regions with no homology to  
453 the target, namely the NOS inverted repeats and an A-rich region.

454 Regarding the chromosome 11 loss in plant 9-1, it is conceivable that a DSB-  
455 induced BFBC could lead to a very small and unstable chromosome, and this is  
456 further supported by the lack of similar loss in control plants that underwent the  
457 same tissue culture process but no DSB induction. Here too, we do not have  
458 direct evidence connecting the CRISPR-Cas-induced DSB and the chromosomal  
459 loss, except not finding such events in SpCas9 control plants. However, at least  
460 in two cases (plants 1-1 and 5-4), the deletions took place precisely at the DSB  
461 site and did not occur in controls, suggesting that these are bona fide DSB-  
462 induced events rather than being tissue culture-induced.

463 The analyses of plants 1-1 and 5-4, including genotyping around the break,  
464 phenotypic marker analysis, whole-genome sequencing and cytological  
465 analyses, supported the hypothesis of the presence of large chromosomal  
466 rearrangements, consistent with BFBC (McClintock, 1941). In plants, BFBC has  
467 been characterized by McClintock several decades ago (McClintock, 1941).  
468 Interestingly, McClintock's BFBC turned out to be induced by a double-Ds  
469 transposon, which might have generated DSBs more challenging for the cell to  
470 repair than those made by simple Ac/Ds elements which generate simple



471 excision footprints rather than large-scale chromosomal rearrangements (Weil  
472 and Wessler, 1993; English, Harrison and Jones, 1993). Likewise, in this work,  
473 one of the loci did not trigger BFBC while the other (on chromosome 11 in an  
474 heterochromatic region) did. CRISPR-Cas-induced BFBC has not yet been  
475 reported in plants and understanding which loci are repaired in a “clean” manner  
476 and which ones undergo a defective repair that generates large-scale genomic  
477 rearrangements is very limited.

478 In mammalian cells, the phenomenon of CRISPR-Cas-induced BFBC has been  
479 recently reported, and it is an important concern for the field of gene therapy  
480 (Zuccaro et al., 2020; Alanis-Lobato et al., 2021; Leibowitz et al., 2021). There, it  
481 is associated with a series of massive rearrangements, including micronuclei  
482 formation and translocation of chromosomal segments into new chromosomal  
483 locations - a phenomenon called chromothripsis (Kwon, Leibowitz, M. and Lee,  
484 2020; Ostapińska, Styka and Lejman, 2022). We report here on a similar  
485 syndrome of catastrophic chromosomal rearrangements, namely the occurrence  
486 of BFBC, micronuclei, chromosome loss, and translocations, showing that  
487 CRISPR-Cas-induced breaks can trigger chromothripsis-like phenomena in  
488 plants. The genetic system developed here, with easy-to-monitor phenotypic  
489 markers paves the way to study the phenomenon of DSB-induced chromothripsis  
490 in plants.

491

## 492 **Materials and Methods**

### 493 **Plant material**

494 *Solanum lycopersicum* M82 *clv3-1* seeds were a kind gift from the Zachary B  
495 Lippman lab (Xu et al., 2015). MT pX11 seeds were a kind gift from the Asaph  
496 Aharoni lab (Polturak et al., 2017). Tomato plants were grown in a greenhouse in  
497 5L pots with controlled climate conditions of  $26\pm 1^\circ\text{C}$  and a light period of under  
498 12hrs.

### 499 **Plasmids**

500 DSB induction was performed by *Streptococcus pyogenes* Cas9 (SpCas9).  
501 Arabidopsis optimized SpCas9 was expressed under Parsley Ubiquitin promoter,  
502 Ubi4-2, and Pea 3A terminator (Fauser, Schiml, and Puchta, 2014). The gRNAs  
503 were expressed under the Arabidopsis U6-26 promoter. A kanamycin resistance  
504 gene was expressed under the *Nopaline Synthase* (Nos) promoter and Nos  
505 terminator (referred to as Nos:NptII:Nos). Plasmids were cloned using the  
506 Golden Braid system (Sarrion-Perdigones et al., 2014).

### 507 **Plant transformation**

508 Transformation of tomato plants was done using *Agrobacterium tumefaciens*  
509 containing our cloned plasmid. M82 cotyledons transformation was done  
510 according to a protocol previously described (Dahan-Meir et al., 2018).

### 511 **Genomic DNA extraction**

512 Two or three small tomato leaflets were collected into 1.5ml tubes and ground.  
513 Extraction was done according to a protocol previously described (Dahan-Meir et  
514 al., 2018), except for genomic DNA for whole-genome sequencing that was  
515 extracted using NucleoSpin DNA purification kit (MACHEREY-NAGEL®).

### 516 **DNA amplification and sequencing**

517 CRISPR-Cas9 footprints of the parent MT SpCas9 + PSY1 gRNA plant was  
518 analyzed using HTS of PCR amplicons (Dahan-Meir et al., 2018). CRISPR-Cas9  
519 DSB regions of the F1 plants [(MT SpCas9 + PSY1 gRNA)/ (M82 pX11 on  
520 chromosome 3)], parent M82 *c/v3* SpCas9 + gRNA2 plant 2, and F1 plants [(M82  
521 *c/v3* SpCas9 + gRNA2)/ (MT pX11 on chromosome 11)], were PCR amplified,  
522 and Sanger sequenced. We used the TIDE (Tracking of indels by decomposition)  
523 web tool for analysis of the Sanger sequencing CRISPR-Cas9 footprints  
524 (Brinkman et al., 2014).

### 525 **Inverse PCR**

526 An inverse PCR protocol was used to determine the location of pX11 (Betalain)  
527 T-DNA in the M82 and MT lines. Nested primers were designed and used in the

528 inverse PCR reaction (Thomas et al., 1994) (Supplementary Table S1). 300ng of  
529 genomic DNA from leaves of M82 and MT pX11 lines were incubated at 37°C  
530 overnight with PstI-HF or HindIII-HF (New England BioLabs®) restriction  
531 enzymes respectively. Followed by 20 minutes at 65°C for restriction enzymes  
532 inactivation. 150ng of the digested fragments were then self-ligated with T4 DNA  
533 ligase (New England BioLabs) for two hours at room temperature. The self-  
534 ligation reaction was then used for the first and second PCR reactions with  
535 nested primers, between which the PCR products were cleaned using magnetic  
536 beads. The second PCR products were cleaned and sequenced by Sanger  
537 sequencing to identify the genomic region flanking the T-DNA left border. Based  
538 on the putative genomic integration site primers were designed for amplification  
539 and sequencing of the genomic sequences and the LB or RB junctions. An  
540 inverse PCR protocol was also used to detect the translocation of chromosome  
541 11 sequence into chromosome 9 in the 5-4 green F1 plant. Genomic DNA was  
542 digested with PstI restriction enzyme. Nested primers were designed and used in  
543 the inverse PCR reaction (Thomas et al., 1994) (Supplementary Table S6). The  
544 rest of the protocol is as above. We sequenced the PCR product by Sanger  
545 sequencing to identify the genomic region of the translocation downstream  
546 junction. Additional PCR primers were designed for verification and Sanger  
547 sequencing of the chromosome 11 into chromosome 9 translocation junctions  
548 (Supplementary Table S7)

#### 549 **Plant regeneration**

550 F1 plants were sterilized and sown in boxes containing Nitsch growth medium,  
551 and once grown, their leaves were dissected to small ~0.5 cm<sup>2</sup> pieces. They  
552 were then transferred to the selection I medium, as described in the plant  
553 transformation section above, but without kanamycin. The leaves were then  
554 gradually transferred to plates containing selection mediums II and III, and then  
555 to boxes with rooting medium and to 5L pots in the greenhouse.

#### 556 **SpCas9 + gRNA transgenic plant generation**

557 The gRNAs were cloned into a Golden braid vector (Sarrion-Perdigones et al.,  
558 2014). PSY1 gRNA was cloned into p3 $\Omega$  1 nos:nptII:nos ubi:SpCas9 U626:PSY1  
559 gRNA. gRNA2 was cloned into p3 $\Omega$  1 nos:nptII:nos ubi:SpCas9 U626:gRNA2.

560 The MT SpCas9 + PSY1 gRNA plant #10 was previously selected (Dahan-Meir  
561 et al., 2018), and was used for crosses with M82 pX11 plants. The heterozygous  
562 (50% -GCT/ 50% -G) footprint in the gRNA recognition sequence in this plant  
563 created the conditions for an allele-specific assay, in which a DSB will occur only  
564 in the M82 parent (Supplementary Table S2).

565 M82 *clv3* cotyledons were transformed with the gRNA2 cassette, regenerated  
566 rooted plants were transferred successfully to the greenhouse, and transformant  
567 plant tissue was collected for DNA extraction and sent to Sanger sequencing of  
568 the target area. Presence of SpCas9 was confirmed in all plants through PCR  
569 amplification with primers from within the Cas9 sequence (Supplementary Table  
570 S3). Different NHEJ repair footprints were observed, and one specific line (M82  
571 *clv3* SpCas9 + gRNA2 plant #2) was chosen for crosses with MT pX11 plants.  
572 The homozygous (100% +T) footprint in the gRNA recognition sequence in this  
573 plant created the conditions for an allele-specific assay, in which a DSB will occur  
574 only in the MT parent (Supplementary Table S2).

### 575 **SNP analysis by Sanger sequencing**

576 To analyze SNPs between M82 and MT at the DSB target sites, and from both  
577 sides of the chromosome 3 PSY1 gRNA or chromosome 11 gRNA2 targets, we  
578 performed PCRs of each selected SNP region, on genomic DNA. The PCR  
579 products were then sequenced by the Sanger method. The details of the PCR  
580 primers and their genomic location are in Supplementary Table S5.

### 581 **Whole genome sequencing and analysis**

582 DNA was purified from leaves of F1, and F2 plants using a DNA purification kit  
583 (MACHEREY-NAGEL®) and then 300 ng sheared by sonication (Bioruptor®,  
584 Diagenode) to 200–500 bp. A total of 10 ng of fragmented DNA per plant was  
585 used for libraries preparation as described in (Ben Shlush et al., 2020). High-

586 throughput sequencing was performed at the Life Sciences Core facilities unit at  
587 the Weizmann Institute of Science with the Illumina NovaSeq 6000, 150 bp  
588 paired-end reads. The coverage of the various genomes was x5-x31  
589 (Supplementary Table S8). The whole genome sequencing reads of the selected  
590 tomato plants were aligned to the SL4.0 tomato genome version (Sol Genomic  
591 Network), as in (Ben Shlush et al., 2020). The reads were viewed and further  
592 analyzed using the IGV browser (Robinson et al., 2011).

### 593 **Coverage analysis**

594 Average coverage was computed using GATK version 3.7. The genome was  
595 divided in windows of 250kb for genome-wide analyses, and 5kb for more  
596 detailed inspections of the expected DNA double-strand break site. Dosage was  
597 estimated by normalizing the observed number of reads per window by the mean  
598 number of reads, stratified by GC content to account for differences in coverage  
599 due to GC content bias. GC content was computed with bedtools nuc version  
600 2.26 across windows. Windows were then subdivided in deciles of GC content,  
601 and the mean number of reads was estimated for each decile, and then used for  
602 normalization. The presence of chromosomal rearrangements on each side of  
603 the Cas9 target site was tested comparing with a likelihood ratio test models in  
604 which no rearrangements, a full deletion of both chromosomes, a single  
605 chromosomal arm deletion or a duplication, occurred after the break assuming a  
606 dosage of 2x, 0.01x, 1x or 3x, respectively, and considering 1Mbp before and  
607 after the break. Rearrangements supported by a p-value lower than 0.001 were  
608 considered as true rearrangements. The R code used for plotting and testing of  
609 the rearrangements can be found at [github.com/fabrimafe/CRISPRcoverage](https://github.com/fabrimafe/CRISPRcoverage).

### 610 **Imaging of meiocytes**

611 Tomato flower buds were fixed in ethanol: acetic acid 3:1 for at least 1 hour, then  
612 kept in 70% ethanol at 4°C. Anthers of flower buds were dissected and stained in  
613 50ng/μl DAPI in ProLong Gold Antifade Mountant. For imaging, we used Nikon  
614 Eclipse Ti microscope, and x100 Nikon N plan Apo lambda 100x/1.45 oil OFN25  
615 DIC N2 lens. Images were transferred into the DeltaVision (Applied Precision)

616 format, deconvolved, and examined in 3D. The images presented in Figure 8, are  
617 flat projections of the 3D images.

618

619 **Funding:** This research and the APC were funded by Israel Science Foundation,  
620 grant number 1027/14, Minerva Foundation, grant number 2016, and the  
621 National Center for Genome Editing in Agriculture, grant number 20-01-0209.  
622 WPP was supported by BARD Senior Research Fellowship no. FR-39-2020

623

624 **Author Contributions:** Conceptualization, A.S. and A.A.L.; methodology, A.S.,  
625 O.G., C.M.-B., T.D.-M., S.F.-H., Z.A., and W.P.P.; software, F.M.; validation, A.S.,  
626 F.M., C.M.-B., and W.P.P.; writing - original draft preparation, O.G., A.S., and  
627 A.A.L.; writing - review and editing, A.S., F.M., O.G., C.M.-B., T.D.-M., S.F.-H.,  
628 Z.A., W.P.P., and A.A.L.; supervision, A.A.L.; project administration, A.S. and  
629 A.A.L.; funding acquisition, A.A.L. All authors have read and agreed to the  
630 published version of the manuscript.

631

632 **Acknowledgments:** The authors would like to thank Prof. Asaph Aharoni for the  
633 MT pX11 plant materials; Prof. Zachary Lippman for the *clv3-1* mutant plant  
634 materials; the Weizmann Institute greenhouse staff for the plants' maintenance;  
635 Dr. Gil Feiguelman for guidance with microscopy and all the Levy lab members  
636 for fruitful discussions and assistance during the course of this study.

637

## 638 **References**

639 Alanis-Lobato, G., Zohren, J., McCarthy, A., Fogarty, N., Kubikova, N., Hardman,  
640 E., Greco, M., Wells, D., Turner, J., & Niakan, K. K. (2021). Frequent loss of  
641 heterozygosity in CRISPR-Cas9-edited early human embryos. Proceedings of  
642 the National Academy of Sciences of the United States of  
643 America 118:e2004832117.

- 644 Baltes, N. J., Gil-Humanes, J., Cermak, T., Atkins, P. A., & Voytas, D. F. (2014).  
645 DNA replicons for plant genome engineering. *The Plant cell* 26:151–163.
- 646 Barra, V., & Fachinetti, D. (2018). The dark side of centromeres: types, causes  
647 and consequences of structural abnormalities implicating centromeric  
648 DNA. *Nature communications* 9:4340.
- 649 Barrangou, R., & Doudna, J. A. (2016). Applications of CRISPR technologies in  
650 research and beyond. *Nature biotechnology* 34:933–941.
- 651 Ben Shlush, I., Samach, A., Melamed-Bessudo, C., Ben-Tov, D., Dahan-Meir, T.,  
652 Filler-Hayut, S., & Levy, A. A. (2020). CRISPR/Cas9 Induced Somatic  
653 Recombination at the CRTISO Locus in Tomato. *Genes* 12:59.
- 654 Beying, N., Schmidt, C., Pacher, M., Houben, A. & Puchta, H. (2020). CRISPR-  
655 Cas9-mediated induction of heritable chromosomal translocations in Arabidopsis.  
656 *Nature plants* 6:638–645.
- 657 Brinkman, E. K., Chen, T., Amendola, M., & van Steensel, B. (2014). Easy  
658 quantitative assessment of genome editing by sequence trace  
659 decomposition. *Nucleic acids research* 42:e168.
- 660 Dahan-Meir, T., Filler-Hayut, S., Melamed-Bessudo, C., Bocobza, S., Czosnek,  
661 H., Aharoni, A., & Levy, A. A. (2018). Efficient in planta gene targeting in tomato  
662 using geminiviral replicons and the CRISPR/Cas9 system. *The Plant journal: for*  
663 *cell and molecular biology* 95:5–16.
- 664 Demirci, S., van Dijk, A. D., Sanchez Perez, G., Aflitos, S. A., de Ridder, D., &  
665 Peters, S. A. (2017). Distribution, position and genomic characteristics of  
666 crossovers in tomato recombinant inbred lines derived from an interspecific cross  
667 between *Solanum lycopersicum* and *Solanum pimpinellifolium*. *The Plant journal:*  
668 *for cell and molecular biology* 89:554–564.
- 669 English, J., Harrison, K., & Jones, J. D. (1993). A genetic analysis of DNA  
670 sequence requirements for Dissociation state I activity in tobacco. *The Plant*  
671 *cell* 5:501–514.

- 672 Fauser, F., Schiml, S., & Puchta, H. (2014). Both CRISPR/Cas-based nucleases  
673 and nickases can be used efficiently for genome engineering in *Arabidopsis*  
674 *thaliana*. *The Plant journal: for cell and molecular biology* 79:348–359.
- 675 Filler-Hayut, S., Melamed Bessudo, C., & Levy, A. A. (2017). Targeted  
676 recombination between homologous chromosomes for precise breeding in  
677 tomato. *Nature communications* 8:15605.
- 678 Filler-Hayut, S., Kniazev, K., Melamed-Bessudo, C., & Levy, A. A. (2021).  
679 Targeted Inter-Homologs Recombination in *Arabidopsis* Euchromatin and  
680 Heterochromatin. *International journal of molecular sciences* 22:12096.
- 681 Gorbunova, V., & Levy, A. A. (1997). Non-homologous DNA end joining in plant  
682 cells is associated with deletions and filler DNA insertions. *Nucleic acids*  
683 *research*.25:4650–4657.
- 684 Gorbunova, V., Avivi-Ragolski, N., Shalev, G., Kovalchuk, I., Abbo, S., Hohn, B.,  
685 & Levy, A. A. A (2000). new hyperrecombinogenic mutant of *Nicotiana*  
686 *tabacum*. *The Plant journal: for cell and molecular biology* 24:601–611.
- 687 Henry, I. M., Comai, L., & Tan, E. H. (2018). Detection of Chromothripsis in  
688 Plants. *Methods in molecular biology (Clifton, N.J.)* 1769:119–132.
- 689 Kwon, M., Leibowitz, M. L., & Lee, J. H. (2020). Small but mighty: the causes and  
690 consequences of micronucleus rupture. *Experimental & molecular*  
691 *medicine* 52:1777–1786.
- 692 Leibowitz ML, Papathanasiou S, Doerfler PA, Blaine LJ, Sun L, Yao Y, Zhang  
693 CZ, Weiss MJ, Pellman D. (2021). Chromothripsis as an on-target consequence  
694 of CRISPR-Cas9 genome editing. *Nature Genetics* 53:895-905.
- 695 Lupski J. R. (1998). Genomic disorders: structural features of the genome can  
696 lead to DNA rearrangements and human disease traits. *Trends in genetics:*  
697 *TIG* 14:417–422.
- 698 McClintock B. (1941). The Stability of Broken Ends of Chromosomes in *Zea*  
699 *Mays*. *Genetics* 26:234–282.



- 700 Molinier, J., Ries, G., Bonhoeffer, S., & Hohn, B. (2004). Interchromatid and  
701 interhomolog recombination in *Arabidopsis thaliana*. *The Plant cell* 16: 342–352.
- 702 Ostapińska, K., Styka, B., & Lejman, M. (2022). Insight into the Molecular Basis  
703 Underlying Chromothripsis. *International journal of molecular sciences* 23:3318.
- 704 Polturak, G., Breitel, D., Grossman, N., Sarrion-Perdigones, A., Weithorn, E.,  
705 Pliner, M., Orzaez, D., Granell, A., Rogachev, I., & Aharoni, A. (2016).  
706 Elucidation of the first committed step in betalain biosynthesis enables the  
707 heterologous engineering of betalain pigments in plants. *The New*  
708 *phytologist* 210:269–283.
- 709 Polturak, G., Grossman, N., Vela-Corcia, D., Dong, Y., Nudel, A., Pliner, M.,  
710 Levy, M., Rogachev, I., & Aharoni, A. (2017). Engineered gray mold resistance,  
711 antioxidant capacity, and pigmentation in betalain-producing crops and  
712 ornamentals. *Proceedings of the National Academy of Sciences of the United*  
713 *States of America* 114:9062–9067.
- 714 Puchta H. (1999). Double-strand break-induced recombination between ectopic  
715 homologous sequences in somatic plant cells. *Genetics* 152:1173–1181.
- 716 Robinson, J. T., Thorvaldsdóttir, H., Winckler, W., Guttman, M., Lander, E. S.,  
717 Getz, G., & Mesirov, J. P. (2011). Integrative genomics viewer. *Nature*  
718 *biotechnology*, 29:24–26.
- 719 Rönspies, M., Dorn, A., Schindele, P., & Puchta, H. (2021). CRISPR-Cas-  
720 mediated chromosome engineering for crop improvement and synthetic  
721 biology. *Nature plants* 7:566–573.
- 722 Sarrion-Perdigones, A., Palaci, J., Granell, A., & Orzaez, D. (2014). Design and  
723 construction of multigenic constructs for plant biotechnology using the  
724 GoldenBraid cloning strategy. *Methods in molecular biology* (Clifton,  
725 N.J.) 1116:133–151.
- 726 Schiml, S., Fauser, F., & Puchta, H. (2014). The CRISPR/Cas system can be  
727 used as nuclease for in planta gene targeting and as paired nickases for directed

- 728 mutagenesis in *Arabidopsis* resulting in heritable progeny. *The Plant journal: for*  
729 *cell and molecular biology* 80:1139–1150.
- 730 Schmidt, C., Fransz, P., Rönspies, M., Dreissig, S., Fuchs, J., Heckmann, S.,  
731 Houben, A., & Puchta, H. (2020). Changing local recombination patterns in  
732 *Arabidopsis* by CRISPR/Cas mediated chromosome engineering. *Nature*  
733 *communications* 11:4418.
- 734 Shalev, G., & Levy, A. A. (1997). The maize transposable element *Ac* induces  
735 recombination between the donor site and an homologous ectopic  
736 sequence. *Genetics* 146:1143–1151.
- 737 Stephens, P. J., Greenman, C. D., Fu, B., Yang, F., Bignell, G. R., Mudie, L. J.,  
738 Pleasance, E. D., Lau, K. W., Beare, D., Stebbings, L. A., McLaren, S., Lin, M. L.,  
739 McBride, D. J., Varela, I., Nik-Zainal, S., Leroy, C., Jia, M., Menzies, A., Butler, A.  
740 P., Teague, J. W., ... Campbell, P. J. (2011). Massive genomic rearrangement  
741 acquired in a single catastrophic event during cancer development. *Cell* 144:27–  
742 40.
- 743 Strack, D., Vogt, T., & Schliemann, W. (2003). Recent advances in betalain  
744 research. *Phytochemistry* 62:247–269.
- 745 Sukegawa, S., Saika, H., & Toki, S. (2021). Plant genome editing: ever more  
746 precise and wide reaching. *The Plant journal: for cell and molecular*  
747 *biology* 106:1208–1218.
- 748 Taagen, E., Bogdanove, A. J., & Sorrells, M. E. (2020). Counting on Crossovers:  
749 Controlled Recombination for Plant Breeding. *Trends in plant science* 25:455–  
750 465.
- 751 Tan, E. H., Henry, I. M., Ravi, M., Bradnam, K. R., Mandakova, T., Marimuthu, M.  
752 P., Korf, I., Lysak, M. A., Comai, L., & Chan, S. W. (2015). Catastrophic  
753 chromosomal restructuring during genome elimination in plants. *eLife* 4:e06516.
- 754 Thomas, C. M., Jones, D. A., English, J. J., Carroll, B. J., Bennetzen, J. L.,  
755 Harrison, K., Burbidge, A., Bishop, G. J., & Jones, J. D. (1994). Analysis of the

756 chromosomal distribution of transposon-carrying T-DNAs in tomato using the  
757 inverse polymerase chain reaction. *Molecular & general genetics*:  
758 *MGG* 242:573–585.

759 Weil, C. F., & Wessler, S. R. (1993). Molecular evidence that chromosome  
760 breakage by Ds elements is caused by aberrant transposition. *The Plant*  
761 *cell* 5:515–522.

762 Xu, C., Liberatore, K. L., MacAlister, C. A., Huang, Z., Chu, Y. H., Jiang, K.,  
763 Brooks, C., Ogawa-Ohnishi, M., Xiong, G., Pauly, M., Van Eck, J., Matsubayashi,  
764 Y., van der Knaap, E., & Lippman, Z. B. (2015). A cascade of  
765 arabinosyltransferases controls shoot meristem size in tomato. *Nature*  
766 *genetics* 47:784–792.

767 Zuccaro, M. V., Xu, J., Mitchell, C., Marin, D., Zimmerman, R., Rana, B.,  
768 Weinstein, E., King, R. T., Palmerola, K. L., Smith, M. E., Tsang, S. H., Goland,  
769 R., Jasin, M., Lobo, R., Treff, N., & Egli, D. (2020). Allele-Specific Chromosome  
770 Removal after Cas9 Cleavage in Human Embryos. *Cell* 183:1650–1664.

771

## 772 **Figure Legends**

### 773 **Figure 1. The Betalain visual assay for loss of heterozygosity (LOH) via** 774 **deletion or crossover**

775 Green MT/ M82 SpCas9 + gRNA is crossed with purple M82/ MT with Betalain  
776 (Bet) expression T-DNA (pX11) to generate an F1 hybrid. The light purple F1 is  
777 hemizygous for the pX11 T-DNA (Bet/bet). The chromosome on MT/ M82  
778 SpCas9 + gRNA target line, has mutations at the gRNA target site and cannot be  
779 broken. The target chromosome in M82/ MT pX11 plants can undergo a DNA  
780 DSB at the target site. The DSB could be perfectly repaired or repaired with small  
781 indels by NHEJ. In these cases, the plants will remain light purple and will not be  
782 selected. LOH outcomes that can generate a WT phenotype (green leaf sector,  
783 yellow flower sector, or red fruit sector without Betalain) are shown in the bottom

784 box. From left to right: loss of DSB distal fragment or part of it that contains the  
785 pX11 T-DNA, whole chromosome loss, or crossover that can generate a twin  
786 sector (WT color adjacent to dark purple). Black circles are representing the  
787 centromere. The purple triangle represents the T-DNA containing the Betalain  
788 marker and the black lightning bolt represents the site of CRISPR-Cas9 break.

### 789 **Figure 2. Sequencing pX11 T-DNA insertion sites by inverse PCR**

790 A: Plant DNA is restricted with restriction enzyme (PstI or HindIII), followed by  
791 self-ligation. B: PCR amplification with two sets of nested primers, A1, A2 then  
792 B1, B2 followed by Sanger sequencing. This enabled the identification of the  
793 genomic sequence at the junctions of the Left border (LB) of the T-DNA. C:  
794 Illustration of SL4.0 chromosome 3 with coordinates of the PSY1 gRNA DSB  
795 (light gray line) target, and the mapped pX11 T-DNA integration site in M82  
796 (purple line). D: Illustration of SL4.0 chromosome 11 with coordinates of the  
797 gRNA2 DSB target (light gray line), the mapped pX11 T-DNA integration site in  
798 MT (purple line), and the *CLV3* locus (red line). Centromere – green box;  
799 heterochromatic region – blue box; euchromatic region – white box. Estimated  
800 SL4.0 coordinates of centromere, heterochromatic and euchromatic regions are  
801 given below in mega bases (Mb). The complete size in Mb for each chromosome  
802 is shown underneath the chromosome illustration.

### 803 **Figure 3. Detection of a targeted somatic crossover event on chromosome** 804 **3 seen as a twin sector**

805 A DSB was induced by the *PSY1* gRNA on chromosome 3, between the  
806 centromere and the Betalain marker. A: Tomato flower of F1 plant [(MT SpCas9  
807 + *PSY1* gRNA)/ (M82 pX11 on chromosome 3)] with uniform light purple color  
808 phenotype. B: Tomato flower of F1 plant [(MT SpCas9 + *PSY1* gRNA)/ (M82  
809 pX11 on chromosome 3)] with chimeric twin-sector color phenotypes (WT yellow  
810 (no transgene) next to a dark purple sector (Bet/Bet). One F2 progeny out of six  
811 in the fruit generated from this flower was a CO event. C: Sanger sequencing  
812 results of three SNPs sets on chromosome 3: 1) Set 8 upstream to the DSB site  
813 towards the telomere side; 2) SpCas9 + *PSY1* gRNA, generated SNP at the DSB

814 site in the MT SpCas9 + PSY1 gRNA background; 3) Set 9 downstream to the  
815 DSB site towards the centromere side. In the CO event F2 generated from the  
816 twin sector flower in the B panel, we see a transition from heterozygous MT/M82  
817 SNPs in set 8 and PSY1 gRNA to homozygous MT SNPs in set 9. Orange  
818 highlight – heterozygous MT/M82 SNPs; red highlight – homozygous M82 SNPs;  
819 yellow highlight - homozygous MT SNPs. D: Scheme of the recombinant  
820 chromosome 3 generated by SpCas9 induced somatic crossover, and detected  
821 by following the Betalain color marker. The F1 somatic recombination event  
822 generated twin sectors as seen in panel B. The putative chromosome 3  
823 genotypes of each sector are presented in panel D. In the viable F2 plant with  
824 CO event, a gamete containing the chromosome 3 somatic CO product of the  
825 purple sector paired with a gamete containing the chromosome 3 MT parental  
826 type. Grey dot – centromere. Purple arrow - Betalain T-DNA integration site.  
827 Black lightning bolt – DSB site. Orange highlight – heterozygous M82/MT SNPs;  
828 red highlight – homozygous M82 SNPs; yellow highlight - homozygous MT  
829 SNPs.

#### 830 **Figure 4. Screening for green sectors regenerated from F1 somatic tissues**

831 We analyzed F1 light purple and SpCas9 positive plants of the genotypes [(MT  
832 SpCas9 + PSY1 gRNA)/ (M82 pX11 on chromosome 3)], or [(M82 *clv3* SpCas9 +  
833 gRNA2)/ (MT pX11 on chromosome 11)]. Green and light purple plantlets  
834 regenerated from pieces of light purple F1 leaves were obtained. A light purple  
835 callus (A) and a light purple plantlet (C) were regenerated from a light purple F1  
836 leaf. Green calli (B) occasionally emerged from a purple callus giving rise to a  
837 green regenerated plantlet (D). Green plantlets were further analyzed as  
838 potential LOH products.

#### 839 **Figure 5. SNP genotyping of regenerated F1 green plant**

840 Six regenerated green plantlets derived from F1 hybrids and their parents were  
841 sequenced for SNP markers in the region around the chromosome 11 gRNA2-  
842 induced DSB and for the *CLV3* marker genotype and phenotype. Coordinates of  
843 SNPs on SL4.0 chromosome 11 are noted in the top row of the table. The DSB

844 point is marked as a grey lightning bolt. A: In plants 3-1, 5-1, and 5-2 the T-DNA  
845 was missing. SNPs were heterozygous for the genotype of both parents,  
846 upstream and downstream of the DSBs all the way to the *CLV3* gene, which is  
847 located ~2 Mb upstream from the telomere, as expected for an F1. Flowers and  
848 fruit had a *CLV3* WT phenotype. B: In plants 1-1, and 5-4, the T-DNA was  
849 missing. Upstream of the DSB point, SNPs were heterozygous. After the DSB  
850 and all the way to the *CLV3* gene, SNPs were homozygous M82. Flowers and  
851 fruit had a *clv3* fasciated phenotype. C: In plant 9-1, The T-DNA was missing.  
852 Upstream and downstream of the DSB, SNPs, including the *CLV3* gene, were  
853 homozygous for M82. Flowers had an extreme *clv3* fasciated phenotype, and no  
854 fruits were generated. Orange highlight – heterozygous M82/MT SNPs; red  
855 highlight – homozygous M82 SNPs; yellow highlight - homozygous MT SNPs.  
856 Chr- chromosome; del – deletion. 3.22Mb – distance between gRNA2 and the  
857 first SNP downstream towards the centromere. 0.18Mb – distance between the  
858 Betalain T-DNA integration site and gRNA2. 0.29Mb – distance between the first  
859 SNP upstream towards the telomere and gRNA2. Grey lightning bolt – DSB site.  
860 Purple arrow - Betalain T-DNA integration site. Red dot – *CLV3* position.

861 **Figure 6. Dosage changes at the induced DSB site by WGS coverage**  
862 **analyses**

863 Average coverage of WGS reads per plant was determined as 2X diploid dosage  
864 basis. A-E: Coverage for each of the 12 chromosomes per plant, is presented  
865 with each chromosome shown in a different color. Panel A and B: parental plants  
866 with 2X in all chromosomes. Panel C: plant 1-1 showing deviation of 2X ploidy in  
867 chromosome 11. Panel F: Plant 1-1 zoom-in on chromosome 11, about 5Mb from  
868 each side of the gRNA2 DSB site. The dosage in each region reveals changes in  
869 ploidy levels. Plant 1-1 shows transition at the DSB site, from a dosage of 3X to  
870 1X. This indicates loss of the region from the DSB site to the telomere in one of  
871 the chromosomes. Panel D: plant 5-4 showing deviation of 2X ploidy in  
872 chromosome 11. Panel G: Plant 5-4 zoom-in on chromosome 11, about 5Mb  
873 from each side of the gRNA2 DSB site. The dosage in each region reveals

874 changes in ploidy levels. Plant 5-4 shows transition at the DSB site, from a  
875 dosage of 2X to 1X. This indicates loss of the region from the DSB site to the  
876 telomere in one of the chromosomes. Panel E: Plant 9-1 shows a dosage of 2X  
877 along all chromosomes but throughout chromosome 11 there is a dosage of 1X  
878 indicating loss of the whole chromosome from one of the parents. Panel H: Plant  
879 9-1 zoom-in on chromosome 11, about 5Mb from each side of the gRNA2 DSB  
880 site. The dosage in each region reveals no change in the ploidy levels showing a  
881 dosage of 1X on both sides of the DSB site. Chr- chromosome. Black lightning  
882 bolt – DSB site.

883 **Figure 7. Analysis of chromosomal rearrangements at DSB sites and an**  
884 **underlying mechanistic model of breakage fusion bridge cycle (BFBC) and**  
885 **chromotripsis**

886 A: Plant 1-1 whole chromosome 11 coverage shows transition at the DSB site,  
887 from a dosage of 3X to 1X. This indicates loss of the region from the DSB site to  
888 the telomere in one of the chromosomes and duplication in the other side of the  
889 DSB marked by a grey A. B: Plant 5-4 whole chromosome 11 coverage reveals  
890 changes in ploidy levels, which are more complicated compared to plant 1-1.  
891 Plant 5-4 shows transition at the DSB site, from a dosage of 2X in the region  
892 marked by blue A to 1X from the DSB site to the telomere. This indicates loss of  
893 the region from the DSB site to the telomere in one of the chromosomes. An  
894 additional change from the average coverage is seen in the region marked by a  
895 blue B, which has a dosage of 1.5X. C: Plant 9-1 whole chromosome 11  
896 coverage. In this plant, the dosage is 1X throughout the whole chromosome 11,  
897 except in the centromere region. D: Illustration of a putative BFBC that could  
898 explain the 3X dosage of the region marked by a grey A in plant 1-1. E:  
899 Illustration of putative two rounds of BFBC that could explain the 2X dosage of  
900 the region marked by a blue A and the 1.5X dosage of the region marked by blue  
901 B in the plant 5-4. The first round is similar to the panel D illustration. But here  
902 maybe the DSB occurred in the stage where two chromatids are present. The  
903 broken chromatid may have invaded the intact chromatid and copied the region

904 containing the gRNA2 target site marked by +. In the second round, the bi-centric  
905 chromosome may have broken at several points. A duplicated part of the region  
906 marked by blue A + that contains the inverted duplicated A region and the  
907 gRNA2 target site from each side of the duplication, may have been cut by the  
908 SpCas9 and translocated into chromosome 9. F: Scheme of the chromosome 11  
909 segment translocated into chromosome 9. We used two PCR primer sets to  
910 amplify and sequence the junctions. Chr9 upstream F + Chr11 gRNA2 far F for  
911 the upstream junction. The amplification of this junction using the Chr11 gRNA2  
912 far F primer indicates the inverted orientation of the chromosome 11 blue A  
913 region. Chr11 gRNA2 far F and Chr9 downstream R used to amplify the  
914 downstream junction indicates the forward orientation of the chromosome 11  
915 blue A region. MT chromosome 11 is highlighted in yellow; M82 chromosome 11  
916 in red; Chromosome 9 in grey. Black lines with a black circle indicate a random  
917 DSB site generated by pulling of the bridge part to two opposite poles in the  
918 dicentric chromosome. The black lightning bolt indicates the SpCas9 DSB site.  
919 The chromosome 11 centromere is at 23.24 Mb, and is marked by a black dot on  
920 the Genomic position (Mb) axis.

921 **Figure 8. Cytological evidence of chromosomal rearrangements and**  
922 **micronuclei in meiocytes**

923 A: Plant 1-1 meiocyte at late anaphase I showing two chromosome bridges  
924 (yellow arrows) and two clumps of chromosomes that have not properly  
925 segregated to daughter cells (pink arrows). B: Plant 1-1 tetrad with a  
926 micronucleus (blue arrow). C: Plant 5-4 tetrad with a micronucleus (blue arrow).  
927 Meiocytes from young flower buds were fixed in 3:1 ethanol: acetic acid and  
928 stained with DAPI.

929



930 **Figures**

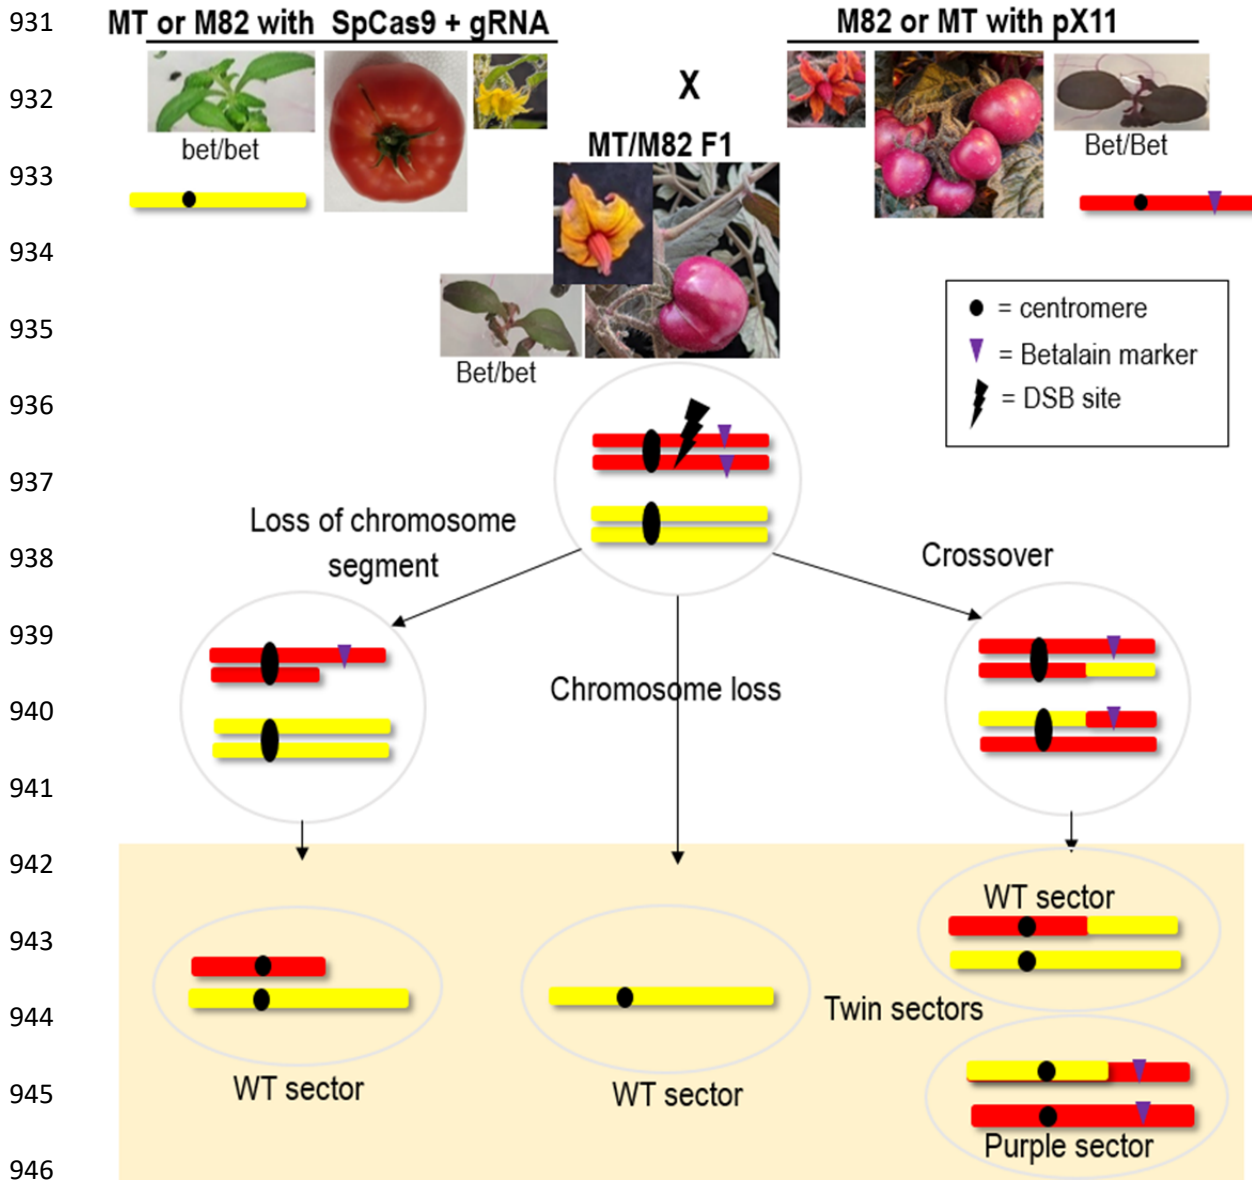

947 **Figure 1. The Betalain visual assay for loss of heterozygosity (LOH) via**  
 948 **deletion or crossover**

949 Green MT/ M82 SpCas9 + gRNA is crossed with purple M82/ MT with Betalain  
 950 (Bet) expression T-DNA (pX11) to generate an F1 hybrid. The light purple F1 is  
 951 hemizygous for the pX11 T-DNA (Bet/bet). The chromosome on MT/ M82  
 952 SpCas9 + gRNA target line, has mutations at the gRNA target site and cannot be  
 953 broken. The target chromosome in M82/ MT pX11 plants can undergo a DNA

954 DSB at the target site. The DSB could be perfectly repaired or repaired with small  
955 indels by NHEJ. In these cases, the plants will remain light purple and will not be  
956 selected. LOH outcomes that can generate a WT phenotype (green leaf sector,  
957 yellow flower sector, or red fruit sector without Betalain) are shown in the bottom  
958 box. From left to right: loss of DSB distal fragment or part of it that contains the  
959 pX11 T-DNA, whole chromosome loss, or crossover that can generate a twin  
960 sector (WT color adjacent to dark purple). Black circles are representing the  
961 centromere. The purple triangle represents the T-DNA containing the Betalain  
962 marker and the black lightning bolt represents the site of CRISPR-Cas9 break.

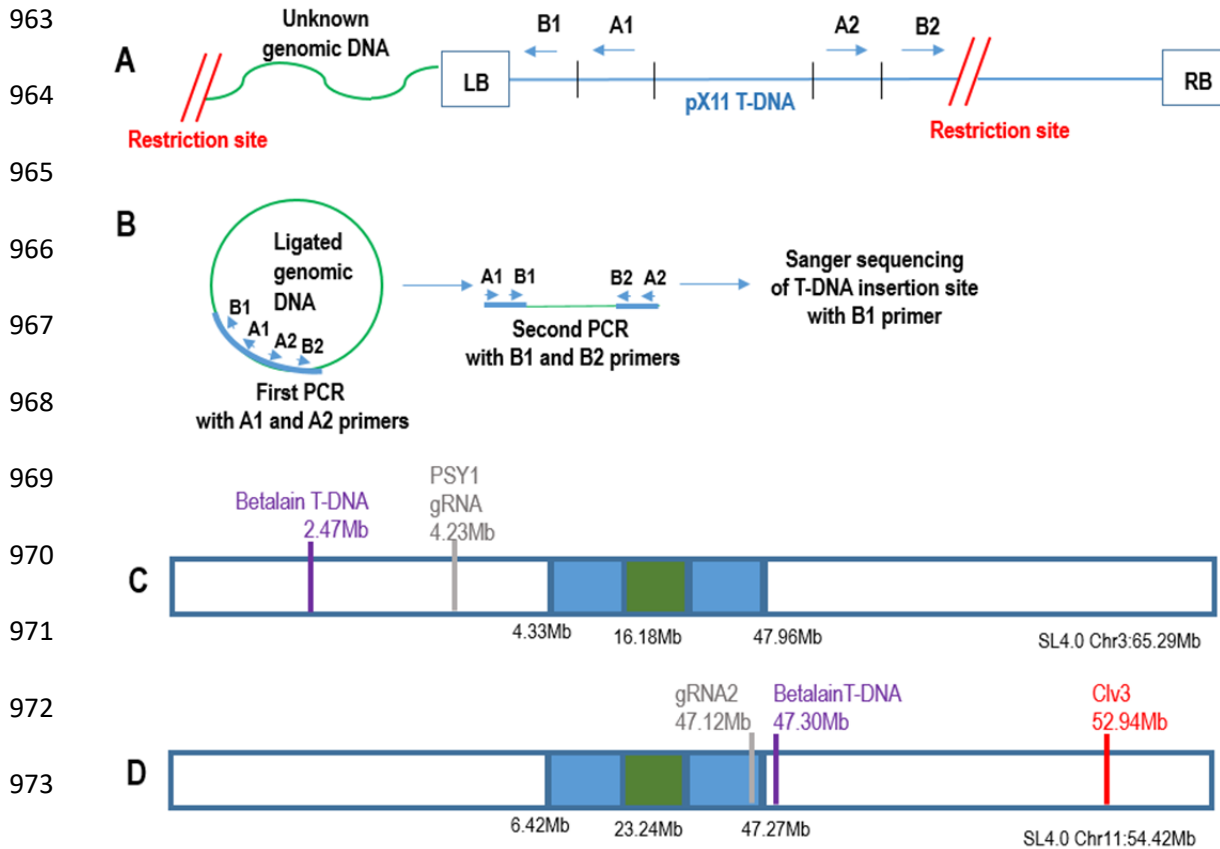

## Figure 2. Sequencing pX11 T-DNA insertion sites by inverse PCR

A: Plant DNA is restricted with restriction enzyme (PstI or HindIII), followed by self-ligation. B: PCR amplification with two sets of nested primers, A1, A2 then B1, B2 followed by Sanger sequencing. This enabled the identification of the genomic sequence at the junctions of the Left border (LB) of the T-DNA. C: Illustration of SL4.0 chromosome 3 with coordinates of the PSY1 gRNA DSB (light gray line) target, and the mapped pX11 T-DNA integration site in M82 (purple line). D: Illustration of SL4.0 chromosome 11 with coordinates of the gRNA2 DSB target (light gray line), the mapped pX11 T-DNA integration site in MT (purple line), and the *CLV3* locus (red line). Centromere – green box; heterochromatic region – blue box; euchromatic region – white box. Estimated SL4.0 coordinates of centromere, heterochromatic and euchromatic regions are given below in mega bases (Mb). The complete size in Mb for each chromosome is shown underneath the chromosome illustration.

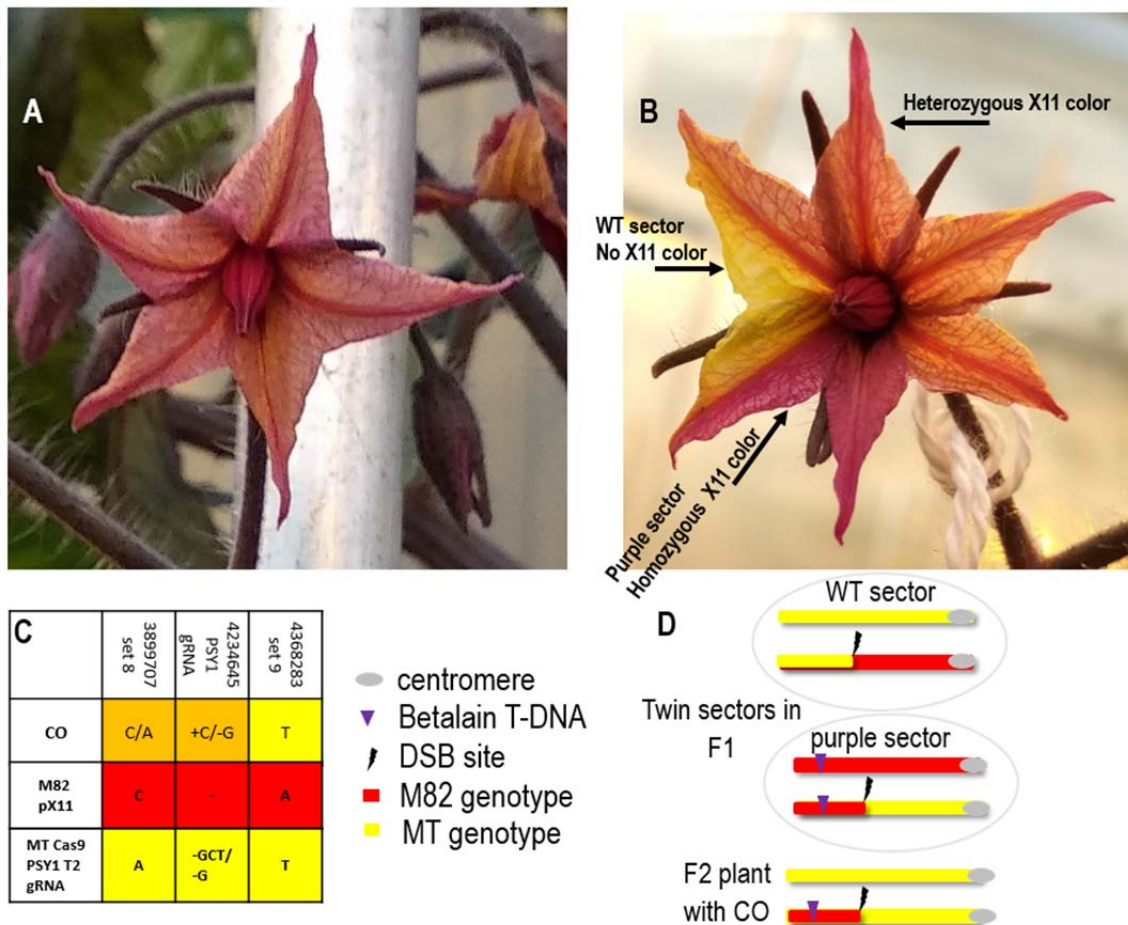

989

990 **Figure 3. Detection of a targeted somatic crossover event on chromosome**  
 991 **3 seen as a twin sector**

992 A DSB was induced by the *PSY1* gRNA on chromosome 3, between the  
 993 centromere and the Betalain marker. A: Tomato flower of F1 plant [(MT SpCas9  
 994 + *PSY1* gRNA)/ (M82 pX11 on chromosome 3)] with uniform light purple color  
 995 phenotype. B: Tomato flower of F1 plant [(MT SpCas9 + *PSY1* gRNA)/ (M82  
 996 pX11 on chromosome 3)] with chimeric twin-sector color phenotypes (WT yellow  
 997 (no transgene) next to a dark purple sector (Bet/Bet). One F2 progeny out of six  
 998 in the fruit generated from this flower was a CO event. C: Sanger sequencing  
 999 results of three SNPs sets on chromosome 3: 1) Set 8 upstream to the DSB site  
 1000 towards the telomere side; 2) SpCas9 + *PSY1* gRNA, generated SNP at the DSB  
 1001 site in the MT SpCas9 + *PSY1* gRNA background; 3) Set 9 downstream to the  
 1002 DSB site towards the centromere side. In the CO event F2 generated from the

1003 twin sector flower in the B panel, we see a transition from heterozygous MT/M82  
1004 SNPs in set 8 and PSY1 gRNA to homozygous MT SNPs in set 9. Orange  
1005 highlight – heterozygous MT/M82 SNPs; red highlight – homozygous M82 SNPs;  
1006 yellow highlight - homozygous MT SNPs. D: Scheme of the recombinant  
1007 chromosome 3 generated by SpCas9 induced somatic crossover, and detected  
1008 by following the Betalain color marker. The F1 somatic recombination event  
1009 generated twin sectors as seen in panel B. The putative chromosome 3  
1010 genotypes of each sector are presented in panel D. In the viable F2 plant with  
1011 CO event, a gamete containing the chromosome 3 somatic CO product of the  
1012 purple sector paired with a gamete containing the chromosome 3 MT parental  
1013 type. Grey dot – centromere. Purple arrow - Betalain T-DNA integration site.  
1014 Black lightning bolt – DSB site. Orange highlight – heterozygous M82/MT SNPs;  
1015 red highlight – homozygous M82 SNPs; yellow highlight - homozygous MT  
1016 SNPs.

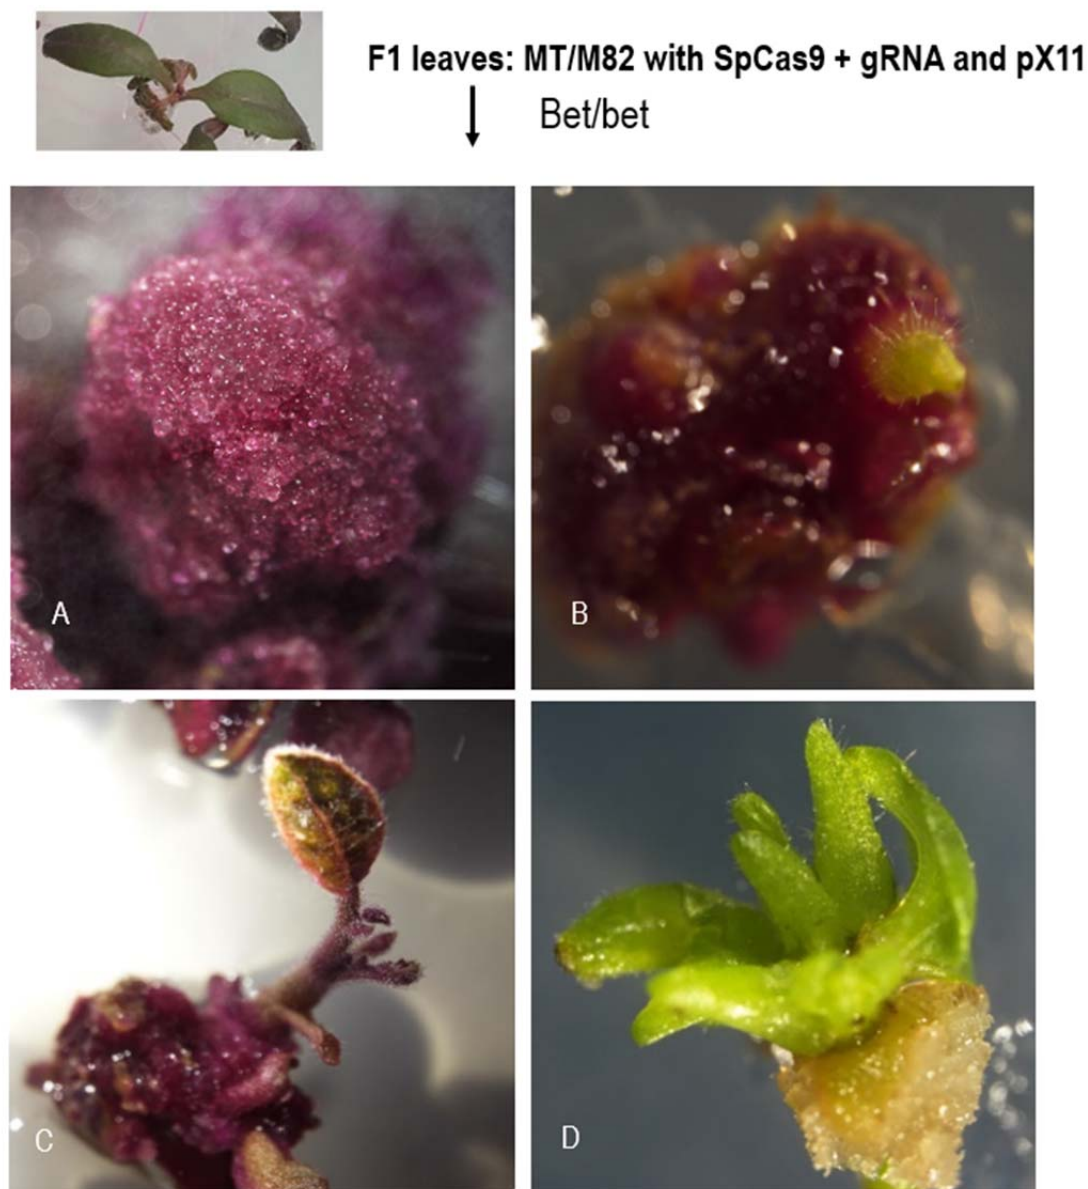

1017

1018 **Figure 4. Screening for green sectors regenerated from F1 somatic tissues**

1019 We analyzed F1 light purple and SpCas9 positive plants of the genotypes [(MT  
1020 SpCas9 + PSY1 gRNA)/ (M82 pX11 on chromosome 3)], or [(M82 *clv3* SpCas9 +  
1021 gRNA2)/ (MT pX11 on chromosome 11)]. Green and light purple plantlets  
1022 regenerated from pieces of light purple F1 leaves were obtained. A light purple  
1023 callus (A) and a light purple plantlet (C) were regenerated from a light purple F1  
1024 leaf. Green calli (B) occasionally emerged from a purple callus giving rise to a  
1025 green regenerated plantlet (D). Green plantlets were further analyzed as  
1026 potential LOH products.

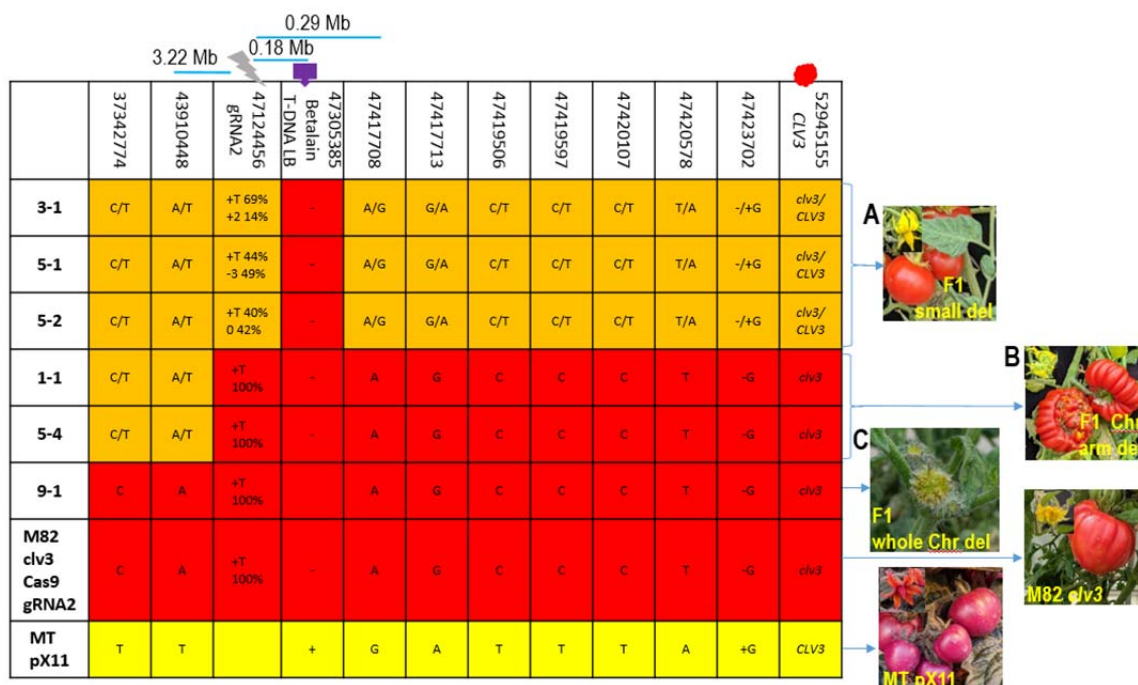

1027

## 1028 Figure 5. SNP genotyping of regenerated F1 green plant

1029 Six regenerated green plantlets derived from F1 hybrids and their parents were  
 1030 sequenced for SNP markers in the region around the chromosome 11 gRNA2-  
 1031 induced DSB and for the *CLV3* marker genotype and phenotype. Coordinates of  
 1032 SNPs on SL4.0 chromosome 11 are noted in the top row of the table. The DSB  
 1033 point is marked as a grey lightning bolt. A: In plants 3-1, 5-1, and 5-2 the T-DNA  
 1034 was missing. SNPs were heterozygous for the genotype of both parents,  
 1035 upstream and downstream of the DSBs all the way to the *CLV3* gene, which is  
 1036 located ~2 Mb upstream from the telomere, as expected for an F1. Flowers and  
 1037 fruit had a *CLV3* WT phenotype. B: In plants 1-1, and 5-4, the T-DNA was  
 1038 missing. Upstream of the DSB point, SNPs were heterozygous. After the DSB  
 1039 and all the way to the *CLV3* gene, SNPs were homozygous M82. Flowers and  
 1040 fruit had a *clv3* fasciated phenotype. C: In plant 9-1, The T-DNA was missing.  
 1041 Upstream and downstream of the DSB, SNPs, including the *CLV3* gene, were  
 1042 homozygous for M82. Flowers had an extreme *clv3* fasciated phenotype, and no  
 1043 fruits were generated. Orange highlight – heterozygous M82/MT SNPs; red  
 1044 highlight – homozygous M82 SNPs; yellow highlight - homozygous MT SNPs.

1045 Chr- chromosome; del – deletion. 3.22Mb – distance between gRNA2 and the  
1046 first SNP downstream towards the centromere. 0.18Mb – distance between the  
1047 Betalain T-DNA integration site and gRNA2. 0.29Mb – distance between the first  
1048 SNP upstream towards the telomere and gRNA2. Grey lightning bolt – DSB site.  
1049 Purple arrow - Betalain T-DNA integration site. Red dot – *CLV3* position.

1050



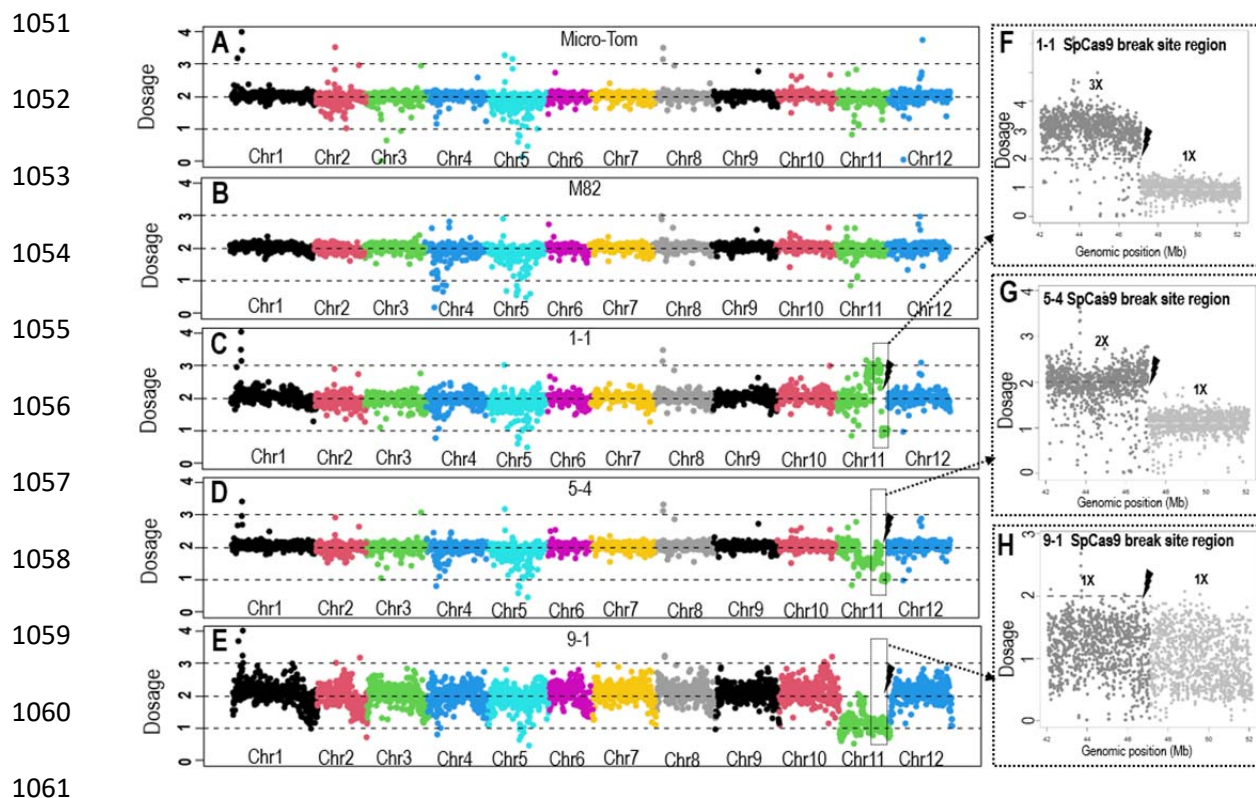

1062 **Figure 6. Dosage changes at the induced DSB site by WGS coverage**  
 1063 **analyses**

1064 Average coverage of WGS reads per plant was determined as 2X diploid dosage  
 1065 basis. A-E: Coverage for each of the 12 chromosomes per plant, is presented  
 1066 with each chromosome shown in a different color. Panel A and B: parental plants  
 1067 with 2X in all chromosomes. Panel C: plant 1-1 showing deviation of 2X ploidy in  
 1068 chromosome 11. Panel F: Plant 1-1 zoom-in on chromosome 11, about 5Mb from  
 1069 each side of the gRNA2 DSB site. The dosage in each region reveals changes in  
 1070 ploidy levels. Plant 1-1 shows transition at the DSB site, from a dosage of 3X to  
 1071 1X. This indicates loss of the region from the DSB site to the telomere in one of  
 1072 the chromosomes. Panel D: plant 5-4 showing deviation of 2X ploidy in  
 1073 chromosome 11. Panel G: Plant 5-4 zoom-in on chromosome 11, about 5Mb  
 1074 from each side of the gRNA2 DSB site. The dosage in each region reveals  
 1075 changes in ploidy levels. Plant 5-4 shows transition at the DSB site, from a  
 1076 dosage of 2X to 1X. This indicates loss of the region from the DSB site to the  
 1077 telomere in one of the chromosomes. Panel E: Plant 9-1 shows a dosage of 2X

1078 along all chromosomes but throughout chromosome 11 there is a dosage of 1X  
1079 indicating loss of the whole chromosome from one of the parents. Panel H: Plant  
1080 9-1 zoom-in on chromosome 11, about 5Mb from each side of the gRNA2 DSB  
1081 site. The dosage in each region reveals no change in the ploidy levels showing a  
1082 dosage of 1X on both sides of the DSB site. Chr- chromosome. Black lightning  
1083 bolt – DSB site.

1084

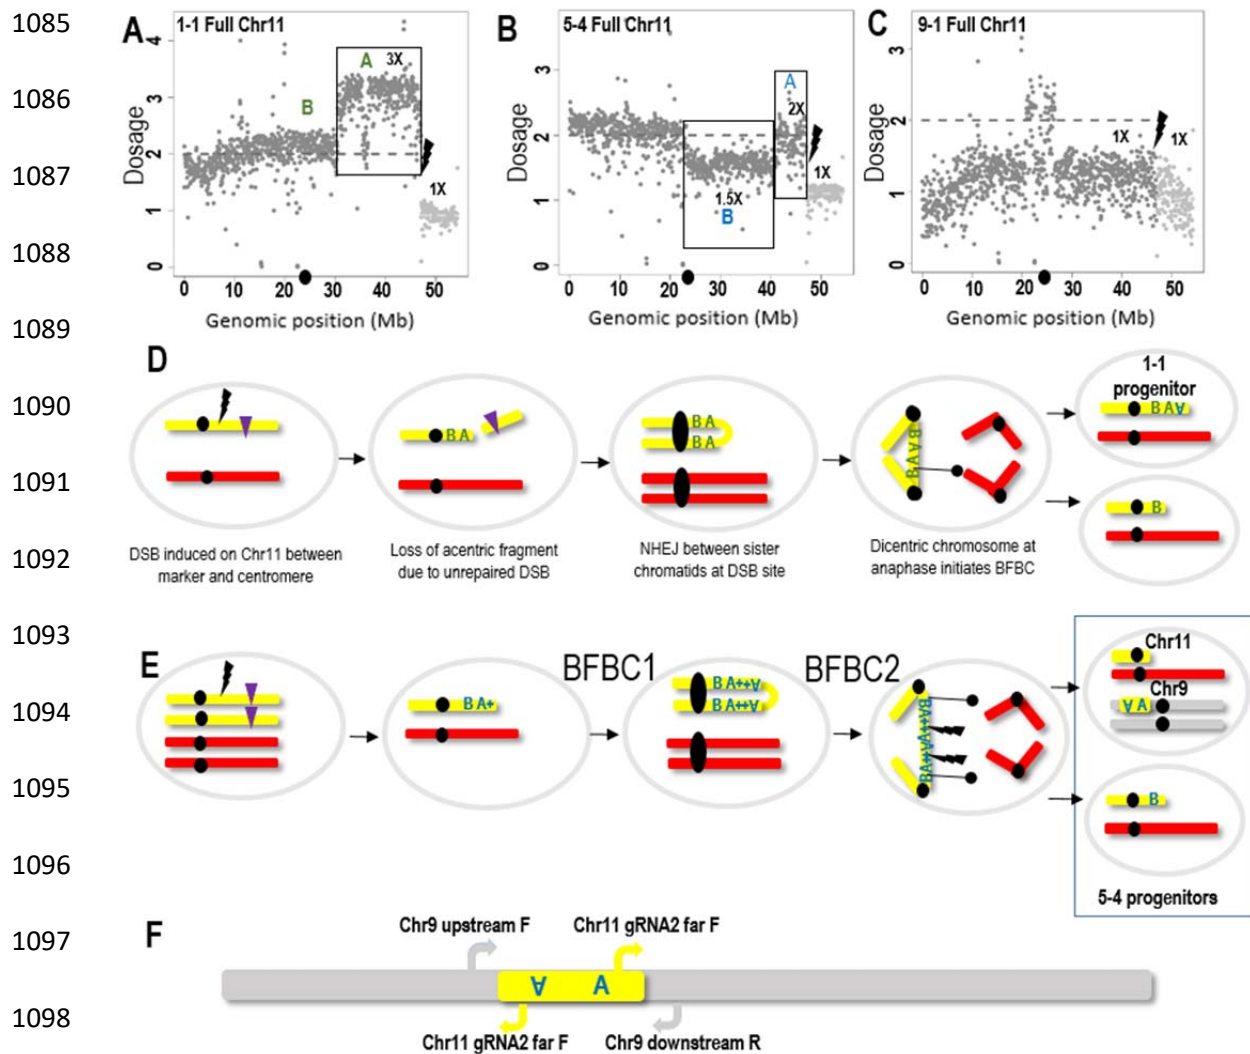

**Figure 7. Analysis of chromosomal rearrangements at DSB sites and an underlying mechanistic model of breakage fusion bridge cycle (BFBC) and chromotripsis**

A: Plant 1-1 whole chromosome 11 coverage shows transition at the DSB site, from a dosage of 3X to 1X. This indicates loss of the region from the DSB site to the telomere in one of the chromosomes and duplication in the other side of the DSB marked by a grey A. B: Plant 5-4 whole chromosome 11 coverage reveals changes in ploidy levels, which are more complicated compared to plant 1-1. Plant 5-4 shows transition at the DSB site, from a dosage of 2X in the region marked by blue A to 1X from the DSB site to the telomere. This indicates loss of

1110 the region from the DSB site to the telomere in one of the chromosomes. An  
1111 additional change from the average coverage is seen in the region marked by a  
1112 blue B, which has a dosage of 1.5X. C: Plant 9-1 whole chromosome 11  
1113 coverage. In this plant, the dosage is 1X throughout the whole chromosome 11,  
1114 except in the centromere region. D: Illustration of a putative BFBC that could  
1115 explain the 3X dosage of the region marked by a grey A in plant 1-1. E:  
1116 Illustration of putative two rounds of BFBC that could explain the 2X dosage of  
1117 the region marked by a blue A and the 1.5X dosage of the region marked by blue  
1118 B in the plant 5-4. The first round is similar to the panel D illustration. But here  
1119 maybe the DSB occurred in the stage where two chromatids are present. The  
1120 broken chromatid may have invaded the intact chromatid and copied the region  
1121 containing the gRNA2 target site marked by +. In the second round, the bi-centric  
1122 chromosome may have broken at several points. A duplicated part of the region  
1123 marked by blue A + that contains the inverted duplicated A region and the  
1124 gRNA2 target site from each side of the duplication, may have been cut by the  
1125 SpCas9 and translocated into chromosome 9. F: Scheme of the chromosome 11  
1126 segment translocated into chromosome 9. We used two PCR primer sets to  
1127 amplify and sequence the junctions. Chr9 upstream F + Chr11 gRNA2 far F for  
1128 the upstream junction. The amplification of this junction using the Chr11 gRNA2  
1129 far F primer indicates the inverted orientation of the chromosome 11 blue A  
1130 region. Chr11 gRNA2 far F and Chr9 downstream R used to amplify the  
1131 downstream junction indicates the forward orientation of the chromosome 11  
1132 blue A region. MT chromosome 11 is highlighted in yellow; M82 chromosome 11  
1133 in red; Chromosome 9 in grey. Black lines with a black circle indicate a random  
1134 DSB site generated by pulling of the bridge part to two opposite poles in the  
1135 dicentric chromosome. The black lightning bolt indicates the SpCas9 DSB site.  
1136 The chromosome 11 centromere is at 23.24 Mb, and is marked by a black dot on  
1137 the Genomic position (Mb) axis.

1138

1139

1140

1141

1142

1143

1144

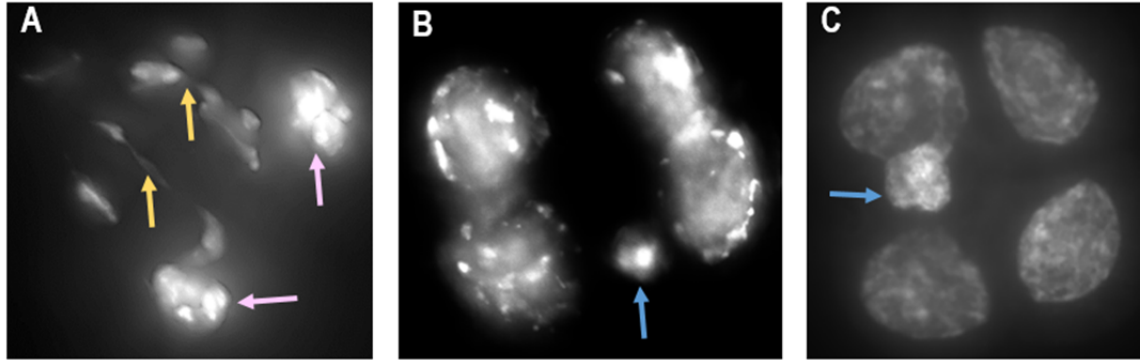

1145

1146 **Figure 8. Cytological evidence of chromosomal rearrangements and**  
1147 **micronuclei in meiocytes**

1148 A: Plant 1-1 meiocyte at late anaphase I showing two chromosome bridges

1149 (yellow arrows) and two clumps of chromosomes that have not properly

1150 segregated to daughter cells (pink arrows). B: Plant 1-1 tetrad with a

1151 micronucleus (blue arrow). C: Plant 5-4 tetrad with a micronucleus (blue arrow).

1152 Meiocytes from young flower buds were fixed in 3:1 ethanol: acetic acid and

1153 stained with DAPI.

1154

1155

1156

1157

1158

1159

1160

1161

1162

## 1163 **Supplementary Materials**

1164

| Primer name | Sequence                  | Primer code in Figure 2 |
|-------------|---------------------------|-------------------------|
| 6746R       | GGCAAGATTAATCCAACCTGGCAA  | A1                      |
| 7454F       | ATTTTCCACCATGATATTCGGCAAG | A2                      |
| 6653R       | ATAAGGACGAGATGGTGGAGTAAAG | B1                      |
| 8143F       | GAACGTCAGTGGAGCATTTTTGA   | B2                      |

1165 **Supplementary Table S1. LB primers for inverse PCR.** Nested primers used  
1166 for the inverse PCR of the T-DNA left border (LB). The first pair, 6746R + 7454F,  
1167 is the inner pair equivalent to A1+A2 in figure 2. The second pair, 6653R +  
1168 8143F, is the outer pair equivalent to B1+B2 in figure 2.

1169

| Target name | Sequence                | Coordinates            |
|-------------|-------------------------|------------------------|
| PSY1 gRNA   | AGCGTATATAATGCTGCTTTGG  | SL4.0 Ch03: 4,234,645  |
| gRNA2       | AGACGACACTCAAAACAACAAGG | SL4.0 Ch11: 47,124,456 |

1170 **Supplementary Table S2. Cas9 DSB Targets on chromosome 3 and**  
1171 **chromosome 11.** The sequence and coordinates for both targets. PAM  
1172 sequence (NGG) in each target is marked in red.

1173

| Primer name | Sequence                            |
|-------------|-------------------------------------|
| Cas9 long_F | CAGAATGAGAAGCTCTACCTCTACTACCTC      |
| Cas9 long_R | GAAATTCATGATGTTAGAGTAGAAGAAATACTTAG |

1174 **Supplementary Table S3. PCR Primers used for SpCas9 positive plants**  
1175 **screening and selection.** SpCas9 primers for verification of Cas9 T-DNA  
1176 cassette presence in transgenic plants.

1177

1178

|                                            | Chromosome 3 PSY1 gRNA     |                 |                                |                 | Chromosome 11 gRNA2        |                 |                                |                 |
|--------------------------------------------|----------------------------|-----------------|--------------------------------|-----------------|----------------------------|-----------------|--------------------------------|-----------------|
|                                            | M82/MT F1<br>in greenhouse |                 | M82/MT F1<br>in tissue culture |                 | M82/MT F1<br>in greenhouse |                 | M82/MT F1<br>in tissue culture |                 |
|                                            | SpCas9                     | SpCas9<br>+gRNA | SpCas9                         | SpCas9<br>+gRNA | SpCas9                     | SpCas9<br>+gRNA | SpCas9                         | SpCas9<br>+gRNA |
| <b>Number of plants</b>                    | 10                         | 10              | 10                             | 10              | 10                         | 10              | 12                             | 9               |
| <b>Number of silencing events</b>          | 0                          | 0               | 1                              | 2               | 0                          | 0               | 1                              | 1               |
| <b>Number of LOH T-DNA loss events</b>     | 0                          | 0               | 0                              | 0               | 0                          | 0               | 0                              | 3               |
| <b>Number of LOH chromosome arm loss</b>   | 0                          | 0               | 0                              | 0               | 0                          | 0               | 0                              | 2               |
| <b>Number of LOH whole chromosome loss</b> | 0                          | 0               | 0                              | 0               | 0                          | 0               | 0                              | 1               |
| <b>Number of LOH crossover</b>             | 0                          | 1               | 0                              | 0               | 0                          | 0               | 0                              | 0               |

1179

1180 **Supplementary Table S4. Silencing and LOH events frequencies.** Number of  
 1181 silencing and LOH events in chromosome 3 or chromosome 11. Plants grown in  
 1182 the greenhouse or cut and regenerated in tissue culture. Control plants with  
 1183 SpCas9 only, and treatment plants with SpCas9 + gRNA.

1184

1185

1186

1187

1188

1189

1190

1191

| Primers pair name     | Primers pair Sequences                                 | SL4.0 SNP Coordinates                                                |
|-----------------------|--------------------------------------------------------|----------------------------------------------------------------------|
| Ch3_set8_seq_F/R      | TGTGGGCTTCTCGGATTGAATG<br>ACAAATTTTTCTGTTAAGTTGTTTTGGA | Ch03: 3899707                                                        |
| SIPSY1_HTS_F/R        | GTATCGCCCCTGAATCAAAG<br>AGTTCTGCAATTTTATTCCAG          | Ch03: 4234645                                                        |
| Ch3_set9_F/R          | GTTTTCTTGTACTCCCTCCG<br>GAGCTGGCTGTTTGGTATTTGG         | Ch03: 4368283                                                        |
| Ch11_set8_F/R         | CAACGCCTTGTGGTCTCTCT<br>TGCATTTCAAGGCTTTTAGTGGT        | Ch11: 37342774                                                       |
| Ch11_set2_F/R         | TGCCTACCAGAGTCATATTTAGCC<br>TTGCATCTCGTTGGTCGATGT      | Ch11: 43910448                                                       |
| gRNA_sanger_pair2_F/R | TCTCCACACCAGTCAATGGT<br>GGCATGGCTTGATTACGAAAGG         | Ch11: 47124490                                                       |
| Ch11_set14_F/R        | CAAAGAAGCTCCAACAGACATTCAA<br>CATGACGATTTGACCTAAAGGGTTT | Ch11: 47417708<br>Ch11: 47417713                                     |
| Ch11_set10_F/R        | AGTATCCAAC TATTCAAGTTCCTCT<br>CCTCAGGGACTAGCATTATCTCT  | Ch11: 47419506<br>Ch11: 47419597<br>Ch11: 47420107<br>Ch11: 47420578 |
| Ch11_set11_F/R        | AGTCATCCATTAAGCACTCAAAA<br>TGTGAATGGTACTTAGACAAGAACT   | Ch11: 47423702                                                       |
| clv3-conf-F/R         | CGTGAGTCTTTACTGCCCTGT<br>GGGCCAAAAACAACAAAAAC          | Ch11: 52945155                                                       |

1192 **Supplementary Table S5. Primers used for sequencing of SNPs in F1, F2**  
1193 **and F3 plants.** Each primers pair was used for PCR amplification of the SNP  
1194 region. One or both primers of each set were used for Sanger sequencing of the  
1195 PCR amplicon.

1196

1197

1198

1199



| Primers pair name         | Primers pair Sequences                                                     | Primer code in Figure 2 |
|---------------------------|----------------------------------------------------------------------------|-------------------------|
| Ch11_gR2_long_F           | GCCAATGAGTCAGGGGCAGAGCCAGCA<br>TAGTATTCTTAGGAAGTCAAGAAAATATT<br>ACCAAGTGAC | A1                      |
| Solyc11g062260_promoter_F | CCGACAATGCGCGACTCCAGACACCGG<br>GTAGGAAACCA                                 | A2                      |
| Seq8_long_F               | GTGAATGATTGTGAGTGTGGAAGAGAAC<br>AAAAATTGTCGTGCAATGCGCGCAAGG                | B1                      |
| Solyc11g062260_5UTR_F     | GGTGAAGTTTTGGTTTTTATAAGCAAATG<br>TGGCGTTAATTGCTTCCTGATTGTTGTT<br>GCGATCCG  | B2                      |

1200 **Supplementary Table S6. Primers used for inverse PCR and detection of**  
1201 **plant 5-4 chromosome 11 into chromosome 9 translocation junctions.**  
1202 Nested primers used for the inverse PCR and detection of plant 5-4 chromosome  
1203 11 into chromosome 9 translocation. The first pair, Ch11\_gR2\_long\_F +  
1204 Solyc11g062260\_promoter\_F, is the inner pair equivalent to A1+A2 in figure 2.  
1205 The second pair, Seq8\_long\_F + Solyc11g062260\_5UTR\_F, is the outer pair  
1206 equivalent to B1+B2 in figure 2.

1207

| Primers pair name      | Primers pair Sequences  | SL4.0 Coordinates  |
|------------------------|-------------------------|--------------------|
| gRNA_pair2_far_F       | CGCTCCGCCACTAACTAGA     | 47123478- 47123497 |
| CHR9_insert_CH11_GR2_R | TGTTAAACGATAGACCCAACCGA | 18620565-18620543  |
| CH9_trans_US_F2        | CACCATGGTTTAAAGGGTCACCT | 18619155- 18619176 |

1208 **Supplementary Table S7. Primers used for sequencing of plant 5-4**  
1209 **chromosome 11 into chromosome 9 translocation junctions.** Each primers  
1210 pair was used for PCR amplification of the junction region. One or both primers of  
1211 each set were used for Sanger sequencing of the PCR amplicon.  
1212 gRNA\_pair2\_far\_F is on chromosome 11 side of both junctions, and was paired  
1213 with each of the chromosome 9 primers.

1214

| Plant                                     | Plant number | Number of reads (x million) | Coverage | Library Complexity (% of duplicates) |
|-------------------------------------------|--------------|-----------------------------|----------|--------------------------------------|
| Chr 3 CO                                  | F2 124       | 33.2                        | X12      | 14%                                  |
| Chr11 T-DNA loss                          | 3-1 (F2 22)  | 13.7                        | X5       | 9%                                   |
| Chr11 T-DNA partial loss (LB, KanR, DODA) | 5-1(F2 10)   | 81.4                        | X31      | 7%                                   |
| Chr11 T-DNA loss                          | 5-2 ( F2 24) | 24.6                        | X9       | 11%                                  |
| Chr11 arm loss                            | 1-1          | 17.9                        | X6       | 5%                                   |
| Chr11 arm loss                            | 5-4          | 28.9                        | X11      | 12%                                  |
| Chr11 loss                                | 9-1          | 43.6                        | X16      | 15%                                  |
| MT                                        |              | 65.5                        | X25      |                                      |
| M82                                       |              | 55                          | X21      | 18%                                  |

1215

1216 **Supplementary Table S8. Whole genome sequencing (WGS) coverage.** For  
1217 WGS we used Illumina NovaSeq 6000, with 150 bp paired-end reads.

1218 Coverage was calculated as read length (300bp) x number of reads / haploid  
1219 genome length (Tomato SL4.0 = 782,520,133 bp).

1220 Chr- chromosome, MT- Micro-Tom

1221

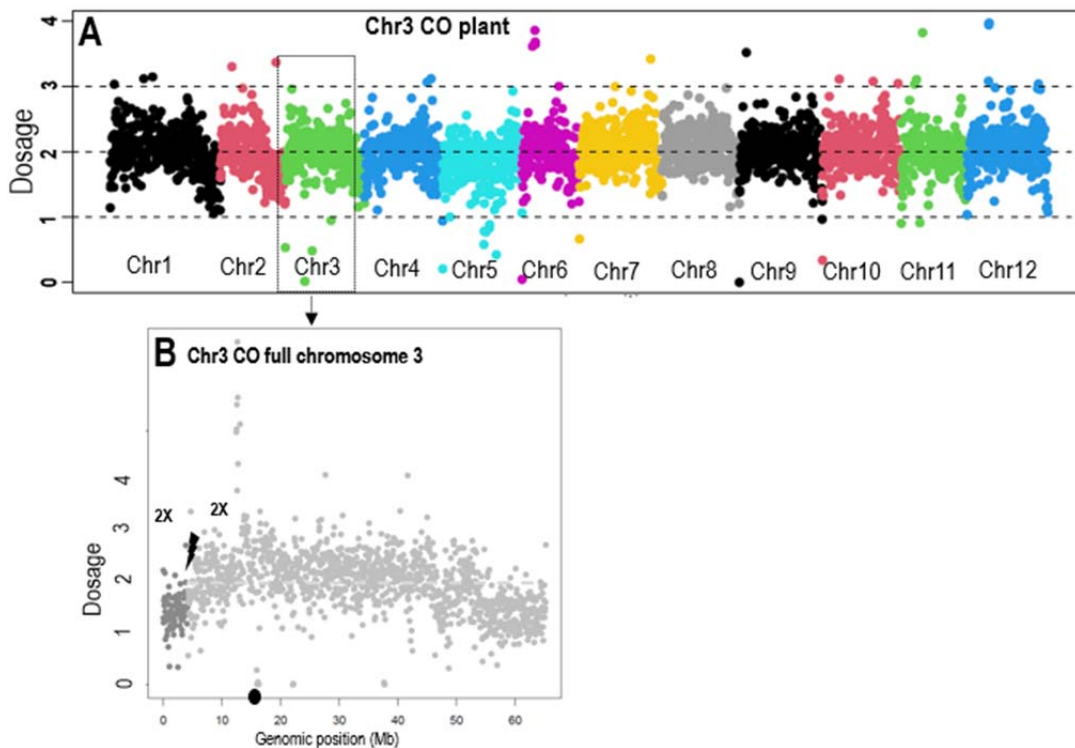

1222

1223 **Supplementary Figure S1. WGS Coverage analyses show no dosage**  
1224 **changes at the induced DSB site of chromosome 3 CO event.** Average  
1225 coverage of WGS reads per plant was determined as 2X diploid dosage basis. A:  
1226 Dosage for each of the 12 chromosomes, is presented with each chromosome  
1227 shown in a different color. B: Dark grey dots are dosage bins from genomic  
1228 position 1 up to the DSB site, and light grey dots are dosage bins from the DSB  
1229 site to the end of chromosome 3. Chromosome 3 CO plant whole chromosome 3  
1230 dosage shows similar ~2X dosage in both sides of the DSB site. This indicates  
1231 that the genotype transition from both sides of the DSB is not due to loss of the  
1232 region from the DSB site to the telomere in one of the chromosomes. Chr-  
1233 chromosome. Black lightning bolt – DSB site. Black dot on Genomic position  
1234 (Mb) axis – centromere.

1235

1236

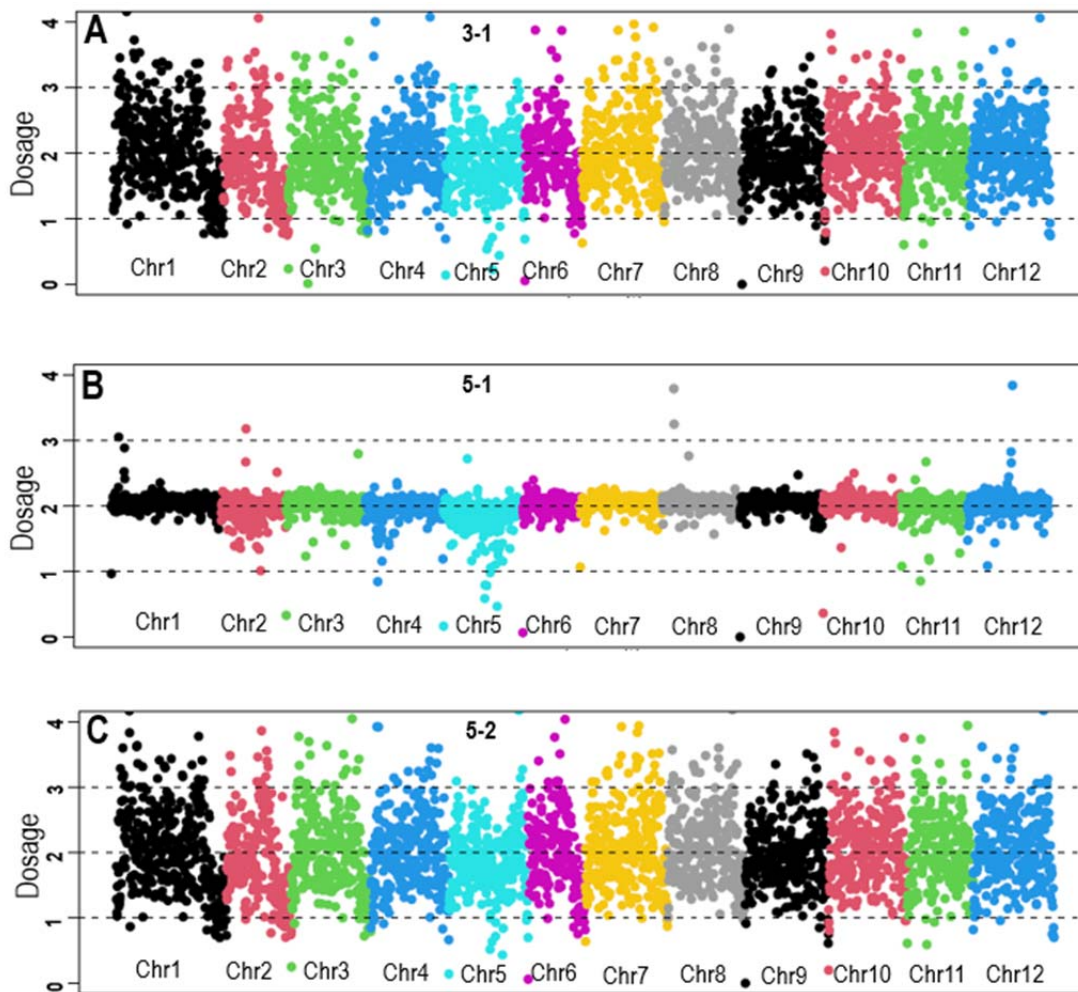

1237

1238 **Supplementary Figure S2. WGS Coverage analyses show no dosage**  
1239 **changes at the induced DSB site of chromosome 11 T-DNA loss events.**

1240 Average coverage of WGS reads per plant was determined as 2X diploid dosage  
1241 basis. A-C: Coverage for each of the 12 chromosomes per plant, is presented  
1242 with each chromosome shown in a different color. Panel A: plant 3-1. Panel B:  
1243 plant 5-1. Panel C: plant 5-2. The dosage in these three plants is 2X in all  
1244 chromosomes. Chr- chromosome.

1245

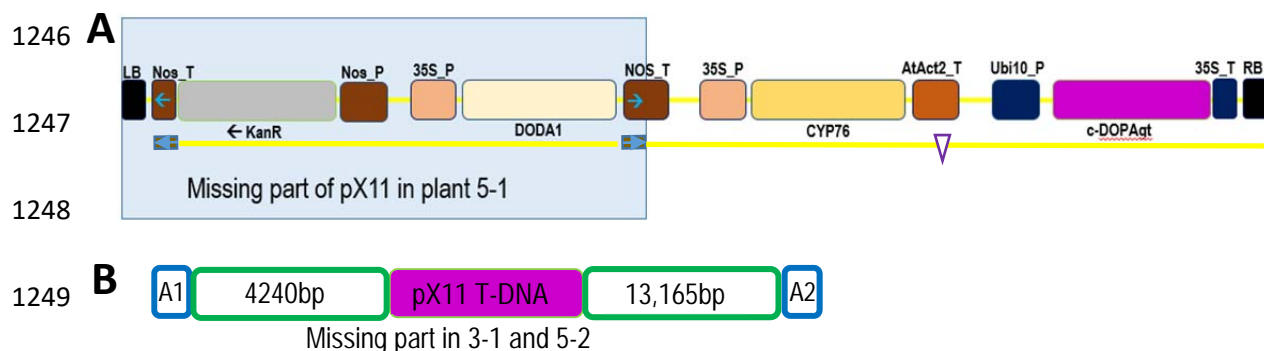

1251 **Supplementary Figure S3. Loss of Betalain expression cassette T-DNA**  
1252 **(pX11) in plants 5-1, 3-1 and 5-2.**

1253 This type of deletion events of plant 5-1, 3-1 and 5-2 was detected only in a plant  
1254 with Cas9 and where a DSB was induced and not in control plants. The distance  
1255 between the DSB and the end of the T-DNA integration sites is 180,895bp. F2  
1256 progeny of each of these plants that were homozygous to MT SNPS in the  
1257 regions flanking the gRNA recognition site and the pX11 T-DNA insertion site,  
1258 were analyzed by WGS. In the deleted region there were no reads.

1259 A: In plant 5-1 a part of the pX11 T-DNA was lost. The region with a blue box  
1260 behind it is the part missing in plant 5-1. The brown boxes with blue arrows in  
1261 them are the NOS terminator repeated sequences in inverted orientations. These  
1262 sequences could anneal and generate a loop of the sequence between them.  
1263 The empty purple triangle indicates the pX11 cassette's sequences that are  
1264 present in plant 5-1 but do not give the Betalain color. KanR: kanamycin  
1265 resistance gene; DODA1: *B. vulgaris* DOPA 4,5-dioxygenase; CYP76: *B. vulgaris*  
1266 cytochrome P450; cDOPAgt: *M. jalapa* cyclo-DOPA-5-O-glucosyltransferase; Nos  
1267 P/T: nopaline synthase promoter/terminator; 35S P/T: CaMV 35S  
1268 promoter/terminator; AtAct2\_T: Arabidopsis actin 2 terminator; Ubi10\_P:  
1269 Arabidopsis ubiquitin 10 promoter.

1270 B: In plants 3-1 and 5-2, two independent F1 regenerated green plants, the same  
1271 region of MT chromosome 11 was deleted. A1 and A2 are A rich repeats flanking  
1272 the deleted region.

1273

1274

1275

1276

1277

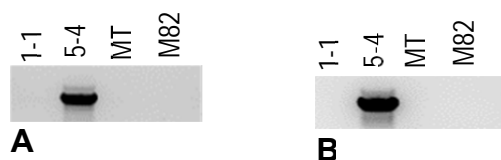

1278

### **Supplementary Figure S4. PCR amplification of chromosome 11**

1279

**translocation into chromosome 9 junctions from plant 5-4.** Two PCR primers

1280

sets were used for amplification of the chromosome 11 translocation into

1281

chromosome 9 junctions (Supplementary Table S6.). In both cases, a PCR

1282

product specific to plant 5-4 was amplified. A: Amplification of the downstream

1283

junction with primers gRNA\_pair2\_far\_F and CHR9\_insert\_CH11\_GR2\_R.

1284

B: Amplification of the upstream junction with primers CH9\_trans\_US\_F2 and

1285

gRNA\_pair2\_far\_F.

1286

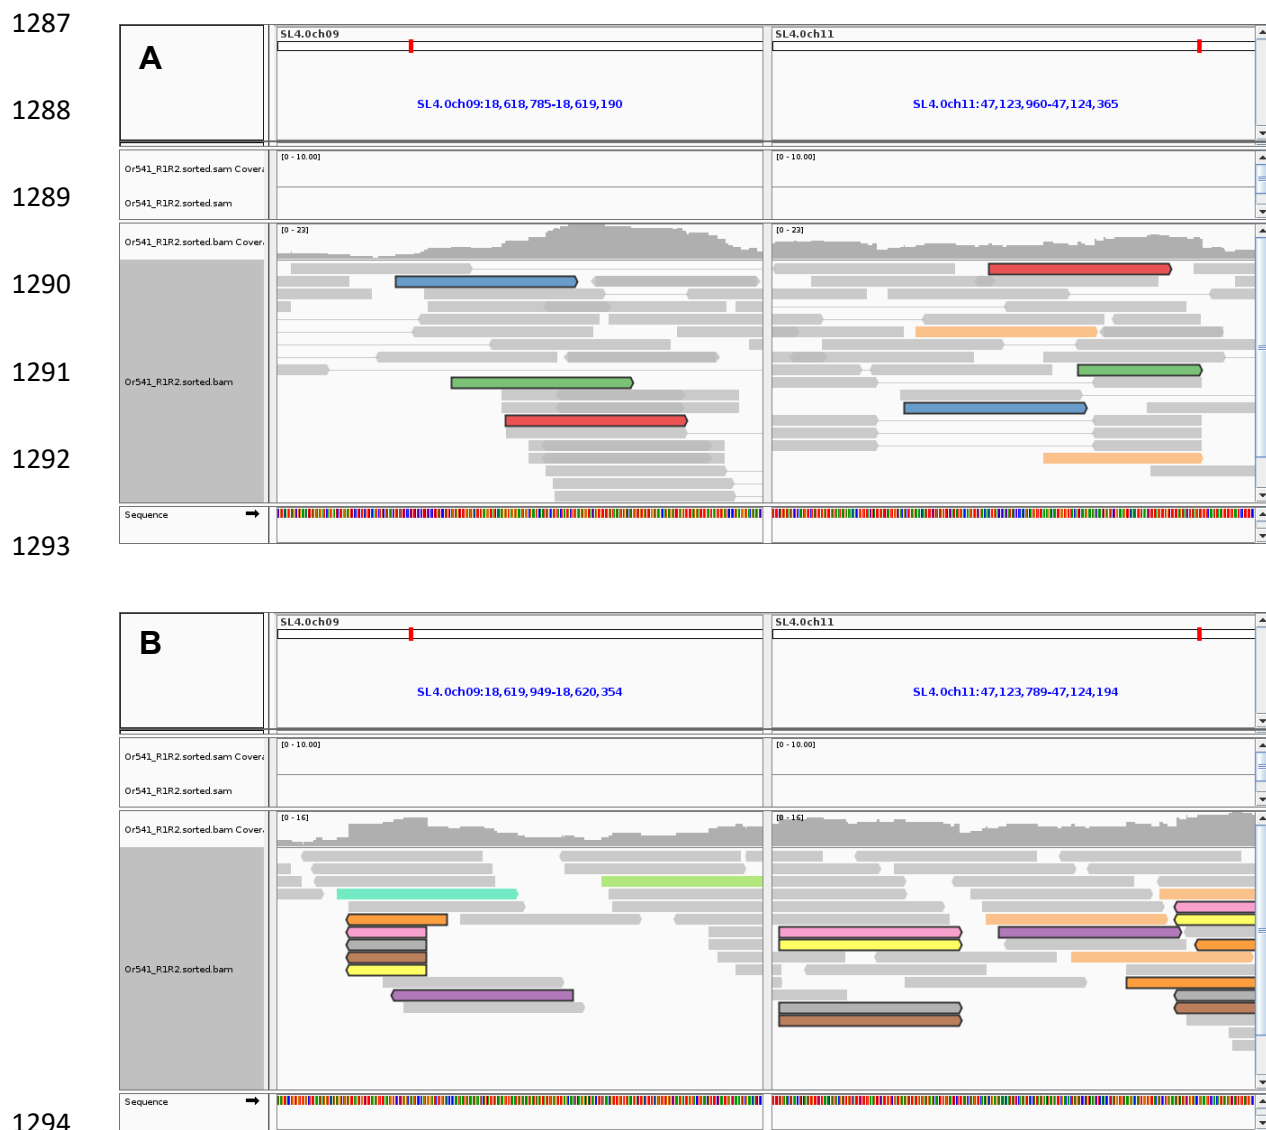

1295 **Supplementary Figure S5. Illumina reads of chromosome 11 translocation**  
1296 **into chromosome 9 junctions.** IGV presentation of the Illumina reads of  
1297 chromosome 11 translocation into chromosome 9 junctions. Reads pairs with  
1298 black lining and the same color indicate either pairs in which the two reads map  
1299 to the two different chromosomes, or split reads in which a single read out of the  
1300 two span the putative translocation site and thus map to two different  
1301 chromosomes. A: Reads of the upstream junction of chromosome 9 and  
1302 chromosome 11. In this case, no individual reads span the translocation site,  
1303 while three read pairs are formed by individual reads mapping to chromosome 9  
1304 and chromosome 11. B: Reads of the downstream junction of chromosome 9 and

1305 chromosome 11. Here one read pair is formed by two individual reads falling  
1306 entirely on chromosome 9 or chromosome 11 (purple), while five out of six reads  
1307 span the translocation junction between the two chromosomes, thus appearing  
1308 truncated and on both sides of the panel, i.e. both on chromosome 9 and 11.  
1309 These reads therefore represent the transition from chromosome 9 to  
1310 chromosome 11 sequences.  
1311



## Parsed Citations

Alanis-Lobato, G., Zohren, J., McCarthy, A., Fogarty, N., Kubikova, N., Hardman, E., Greco, M., Wells, D., Turner, J., & Niakan, K. K. (2021). Frequent loss of heterozygosity in CRISPR-Cas9-edited early human embryos. *Proceedings of the National Academy of Sciences of the United States of America* 118:e2004832117.

Google Scholar: [Author Only](#) [Title Only](#) [Author and Title](#)

Baltes, N. J., Gil-Humanes, J., Cermak, T., Atkins, P. A., & Voytas, D. F. (2014). DNA replicons for plant genome engineering. *The Plant cell* 26:151–163.

Google Scholar: [Author Only](#) [Title Only](#) [Author and Title](#)

Barra, V., & Fachinetti, D. (2018). The dark side of centromeres: types, causes and consequences of structural abnormalities implicating centromeric DNA. *Nature communications* 9:4340.

Google Scholar: [Author Only](#) [Title Only](#) [Author and Title](#)

Barrangou, R., & Doudna, J. A. (2016). Applications of CRISPR technologies in research and beyond. *Nature biotechnology* 34:933–941.

Google Scholar: [Author Only](#) [Title Only](#) [Author and Title](#)

Ben Shlush, I., Samach, A., Melamed-Bessudo, C., Ben-Tov, D., Dahan-Meir, T., Filler-Hayut, S., & Levy, A. A. (2020). CRISPR/Cas9 Induced Somatic Recombination at the CRTISO Locus in Tomato. *Genes* 12:59.

Google Scholar: [Author Only](#) [Title Only](#) [Author and Title](#)

Beying, N., Schmidt, C., Pacher, M., Houben, A. & Puchta, H. (2020). CRISPR-Cas9-mediated induction of heritable chromosomal translocations in Arabidopsis. *Nature plants* 6:638–645.

Google Scholar: [Author Only](#) [Title Only](#) [Author and Title](#)

Brinkman, E. K., Chen, T., Amendola, M., & van Steensel, B. (2014). Easy quantitative assessment of genome editing by sequence trace decomposition. *Nucleic acids research* 42:e168.

Google Scholar: [Author Only](#) [Title Only](#) [Author and Title](#)

Dahan-Meir, T., Filler-Hayut, S., Melamed-Bessudo, C., Bocobza, S., Czosnek, H., Aharoni, A., & Levy, A. A. (2018). Efficient in planta gene targeting in tomato using geminiviral replicons and the CRISPR/Cas9 system. *The Plant journal: for cell and molecular biology* 95:5–16.

Google Scholar: [Author Only](#) [Title Only](#) [Author and Title](#)

Demirci, S., van Dijk, A. D., Sanchez Perez, G., Aflitos, S. A., de Ridder, D., & Peters, S. A. (2017). Distribution, position and genomic characteristics of crossovers in tomato recombinant inbred lines derived from an interspecific cross between *Solanum lycopersicum* and *Solanum pimpinellifolium*. *The Plant journal: for cell and molecular biology* 89:554–564.

Google Scholar: [Author Only](#) [Title Only](#) [Author and Title](#)

English, J., Harrison, K., & Jones, J. D. (1993). A genetic analysis of DNA sequence requirements for Dissociation state I activity in tobacco. *The Plant cell* 5:501–514.

Google Scholar: [Author Only](#) [Title Only](#) [Author and Title](#)

Fausser, F., Schirni, S., & Puchta, H. (2014). Both CRISPR/Cas-based nucleases and nickases can be used efficiently for genome engineering in *Arabidopsis thaliana*. *The Plant journal: for cell and molecular biology* 79:348–359.

Google Scholar: [Author Only](#) [Title Only](#) [Author and Title](#)

Filler-Hayut, S., Melamed Bessudo, C., & Levy, A. A. (2017). Targeted recombination between homologous chromosomes for precise breeding in tomato. *Nature communications* 8:15605.

Google Scholar: [Author Only](#) [Title Only](#) [Author and Title](#)

Filler-Hayut, S., Kniazev, K., Melamed-Bessudo, C., & Levy, A. A. (2021). Targeted Inter-Homologs Recombination in Arabidopsis Euchromatin and Heterochromatin. *International journal of molecular sciences* 22:12096.

Google Scholar: [Author Only](#) [Title Only](#) [Author and Title](#)

Gorbunova, V., & Levy, A. A. (1997). Non-homologous DNA end joining in plant cells is associated with deletions and filler DNA insertions. *Nucleic acids research* 25:4650–4657.

Google Scholar: [Author Only](#) [Title Only](#) [Author and Title](#)

Gorbunova, V., Avivi-Ragolski, N., Shalev, G., Kovalchuk, I., Abbo, S., Hohn, B., & Levy, A. A. (2000). new hyperrecombinogenic mutant of *Nicotiana tabacum*. *The Plant journal: for cell and molecular biology* 24:601–611.

Google Scholar: [Author Only](#) [Title Only](#) [Author and Title](#)

Henry, I. M., Comai, L., & Tan, E. H. (2018). Detection of Chromothripsis in Plants. *Methods in molecular biology (Clifton, N.J.)* 1769:119–132.

Google Scholar: [Author Only](#) [Title Only](#) [Author and Title](#)

Kwon, M., Leibowitz, M. L., & Lee, J. H. (2020). Small but mighty: the causes and consequences of micronucleus rupture.

**Experimental & molecular medicine** 52:1777–1786.

Google Scholar: [Author Only](#) [Title Only](#) [Author and Title](#)

**Leibowitz ML, Papathanasiou S, Doerfler PA, Blaine LJ, Sun L, Yao Y, Zhang CZ, Weiss MJ, Pellman D. (2021). Chromothripsis as an on-target consequence of CRISPR-Cas9 genome editing. *Nature Genetics* 53:895-905.**

Google Scholar: [Author Only](#) [Title Only](#) [Author and Title](#)

**Lupski J. R. (1998). Genomic disorders: structural features of the genome can lead to DNA rearrangements and human disease traits. *Trends in genetics: TIG* 14:417–422.**

Google Scholar: [Author Only](#) [Title Only](#) [Author and Title](#)

**McClintock B. (1941). The Stability of Broken Ends of Chromosomes in Zea Mays. *Genetics* 26:234–282.**

Google Scholar: [Author Only](#) [Title Only](#) [Author and Title](#)

**Molinier, J., Ries, G., Bonhoeffer, S., & Hohn, B. (2004). Interchromatid and interhomolog recombination in *Arabidopsis thaliana*. *The Plant cell* 16: 342–352.**

Google Scholar: [Author Only](#) [Title Only](#) [Author and Title](#)

**Ostapińska, K., Styka, B., & Lejman, M. (2022). Insight into the Molecular Basis Underlying Chromothripsis. *International journal of molecular sciences* 23:3318.**

Google Scholar: [Author Only](#) [Title Only](#) [Author and Title](#)

**Polturak, G., Breitel, D., Grossman, N., Sarrion-Perdigones, A., Weithorn, E., Pliner, M., Orzaez, D., Granell, A., Rogachev, I., & Aharoni, A. (2016). Elucidation of the first committed step in betalain biosynthesis enables the heterologous engineering of betalain pigments in plants. *The New phytologist* 210:269–283.**

Google Scholar: [Author Only](#) [Title Only](#) [Author and Title](#)

**Polturak, G., Grossman, N., Vela-Corcía, D., Dong, Y., Nudel, A., Pliner, M., Levy, M., Rogachev, I., & Aharoni, A. (2017). Engineered gray mold resistance, antioxidant capacity, and pigmentation in betalain-producing crops and ornamentals. *Proceedings of the National Academy of Sciences of the United States of America* 114:9062–9067.**

Google Scholar: [Author Only](#) [Title Only](#) [Author and Title](#)

**Puchta H. (1999). Double-strand break-induced recombination between ectopic homologous sequences in somatic plant cells. *Genetics* 152:1173–1181.**

Google Scholar: [Author Only](#) [Title Only](#) [Author and Title](#)

**Robinson, J. T., Thorvaldsdóttir, H., Winckler, W., Guttman, M., Lander, E. S., Getz, G., & Mesirov, J. P. (2011). Integrative genomics viewer. *Nature biotechnology*, 29:24–26.**

Google Scholar: [Author Only](#) [Title Only](#) [Author and Title](#)

**Rönspies, M., Dorn, A., Schindele, P., & Puchta, H. (2021). CRISPR-Cas-mediated chromosome engineering for crop improvement and synthetic biology. *Nature plants* 7:566–573.**

Google Scholar: [Author Only](#) [Title Only](#) [Author and Title](#)

**Sarrion-Perdigones, A., Palaci, J., Granell, A., & Orzaez, D. (2014). Design and construction of multigenic constructs for plant biotechnology using the GoldenBraid cloning strategy. *Methods in molecular biology (Clifton, N.J.)* 1116:133–151.**

Google Scholar: [Author Only](#) [Title Only](#) [Author and Title](#)

**Schimi, S., Fauser, F., & Puchta, H. (2014). The CRISPR/Cas system can be used as nuclease for in planta gene targeting and as paired nickases for directed mutagenesis in *Arabidopsis* resulting in heritable progeny. *The Plant journal: for cell and molecular biology* 80:1139–1150.**

Google Scholar: [Author Only](#) [Title Only](#) [Author and Title](#)

**Schmidt, C., Frasz, P., Rönspies, M., Dreissig, S., Fuchs, J., Heckmann, S., Houben, A., & Puchta, H. (2020). Changing local recombination patterns in *Arabidopsis* by CRISPR/Cas mediated chromosome engineering. *Nature communications* 11:4418.**

Google Scholar: [Author Only](#) [Title Only](#) [Author and Title](#)

**Shalev, G., & Levy, A. A. (1997). The maize transposable element *Ac* induces recombination between the donor site and an homologous ectopic sequence. *Genetics* 146:1143–1151.**

Google Scholar: [Author Only](#) [Title Only](#) [Author and Title](#)

**Stephens, P. J., Greenman, C. D., Fu, B., Yang, F., Bignell, G. R., Mudie, L. J., Pleasance, E. D., Lau, K. W., Beare, D., Stebbings, L. A., McLaren, S., Lin, M. L., McBride, D. J., Varela, I., Nik-Zainal, S., Leroy, C., Jia, M., Menzies, A., Butler, A. P., Teague, J. W., ... Campbell, P. J. (2011). Massive genomic rearrangement acquired in a single catastrophic event during cancer development. *Cell* 144:27–40.**

Google Scholar: [Author Only](#) [Title Only](#) [Author and Title](#)

**Strack, D., Vogt, T., & Schliemann, W. (2003). Recent advances in betalain research. *Phytochemistry* 62:247–269.**

Google Scholar: [Author Only](#) [Title Only](#) [Author and Title](#)

**Sukegawa, S., Saika, H., & Toki, S. (2021). Plant genome editing: ever more precise and wide reaching. *The Plant journal: for cell and molecular biology* 106:1208–1218.**

Google Scholar: [Author Only](#) [Title Only](#) [Author and Title](#)

**Taagen, E., Bogdanove, A. J., & Sorrells, M. E. (2020). Counting on Crossovers: Controlled Recombination for Plant Breeding. *Trends in plant science* 25:455–465.**

Google Scholar: [Author Only](#) [Title Only](#) [Author and Title](#)

**Tan, E. H., Henry, I. M., Ravi, M., Bradnam, K. R., Mandakova, T., Marimuthu, M. P., Korf, I., Lysak, M. A., Comai, L., & Chan, S. W. (2015). Catastrophic chromosomal restructuring during genome elimination in plants. *eLife* 4:e06516.**

Google Scholar: [Author Only](#) [Title Only](#) [Author and Title](#)

**Thomas, C. M., Jones, D. A., English, J. J., Carroll, B. J., Bennetzen, J. L., Harrison, K., Burbidge, A., Bishop, G. J., & Jones, J. D. (1994). Analysis of the chromosomal distribution of transposon-carrying T-DNAs in tomato using the inverse polymerase chain reaction. *Molecular & general genetics: MGG* 242:573–585.**

Google Scholar: [Author Only](#) [Title Only](#) [Author and Title](#)

**Weil, C. F., & Wessler, S. R. (1993). Molecular evidence that chromosome breakage by Ds elements is caused by aberrant transposition. *The Plant cell* 5:515–522.**

Google Scholar: [Author Only](#) [Title Only](#) [Author and Title](#)

**Xu, C., Liberatore, K. L., MacAlister, C. A., Huang, Z., Chu, Y. H., Jiang, K., Brooks, C., Ogawa-Ohnishi, M., Xiong, G., Pauly, M., Van Eck, J., Matsubayashi, Y., van der Knaap, E., & Lippman, Z. B. (2015). A cascade of arabinosyltransferases controls shoot meristem size in tomato. *Nature genetics* 47:784–792.**

Google Scholar: [Author Only](#) [Title Only](#) [Author and Title](#)

**Zuccaro, M. V., Xu, J., Mitchell, C., Marin, D., Zimmerman, R., Rana, B., Weinstein, E., King, R. T., Palmerola, K. L., Smith, M. E., Tsang, S. H., Goland, R., Jasin, M., Lobo, R., Treff, N., & Egli, D. (2020). Allele-Specific Chromosome Removal after Cas9 Cleavage in Human Embryos. *Cell* 183:1650–1664.**

Google Scholar: [Author Only](#) [Title Only](#) [Author and Title](#)
